# Supplementary material for: Intermolecular charge transfer facilitated synthesis and spectral characterization of Schiff bases of a weak nucleophile 2,3-diamino-1,4-naphthoquinone
Source: Royal Society of Chemistry journal article supplement (doi:10.1039/c2ra21372a), 2012-11-21
Supplement: c2ra21372a.pdf [file c2ra21372a.pdf]

## Supporting information:

### Table of Contents

|                                                                      | <b>Page</b>    |
|----------------------------------------------------------------------|----------------|
| 1. NMR Spectra for the Compounds.....                                | <b>S2- S21</b> |
| 2. Electronic spectra of DANQ with HMB quenching study.....          | <b>S22</b>     |
| 3. Scott linear plot.....                                            | <b>S23</b>     |
| 4. Stern- Volmer plot.....                                           | <b>S24</b>     |
| 5. Ward linear plot for HMB- DANQ in chloroform at298 K .....        | <b>S25</b>     |
| 6. Ward linear plot for HMB – DANQ in chloroform at 298 K .....      | <b>S26</b>     |
| 7. Ward linear plot for HMB- 3i in chloroform at298 K .....          | <b>S27</b>     |
| 8. Tables of Z-matrix and Cartesian coordinates of HMB and DANQ..... | <b>S28-31</b>  |
| 9. Table of Energy gap for DANQ and imines (3a – 3g) .....           | <b>S32</b>     |
| 10. Determination of $K_f$ value by Ward method .....                | <b>S33</b>     |
| 11. Solvent effect on intramolecular CT transition .....             | <b>S34</b>     |

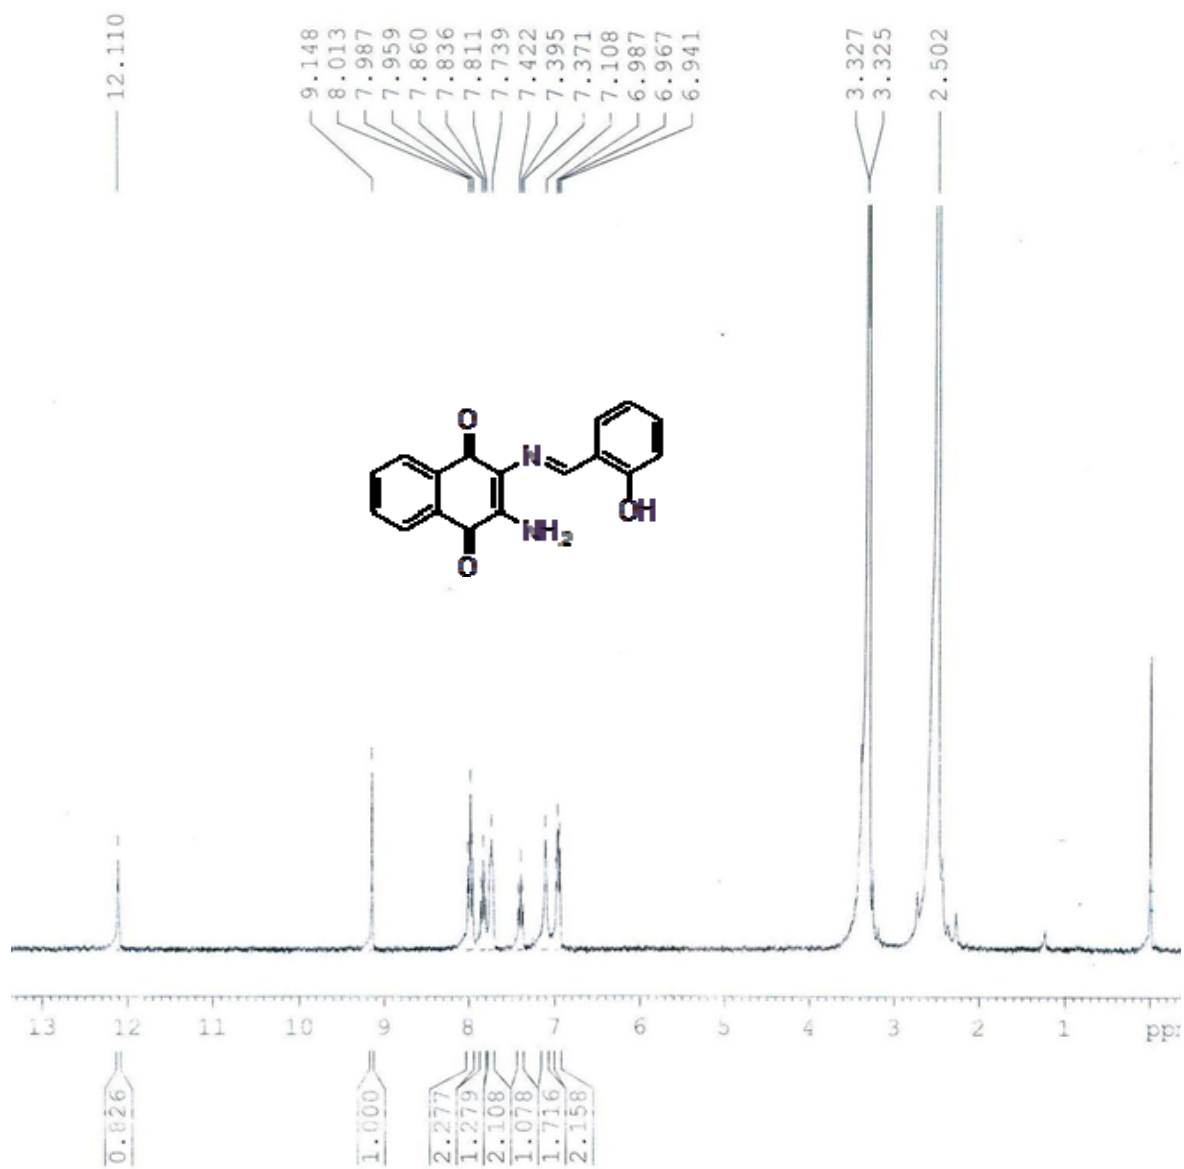

<sup>1</sup>H NMR spectrum of 3a

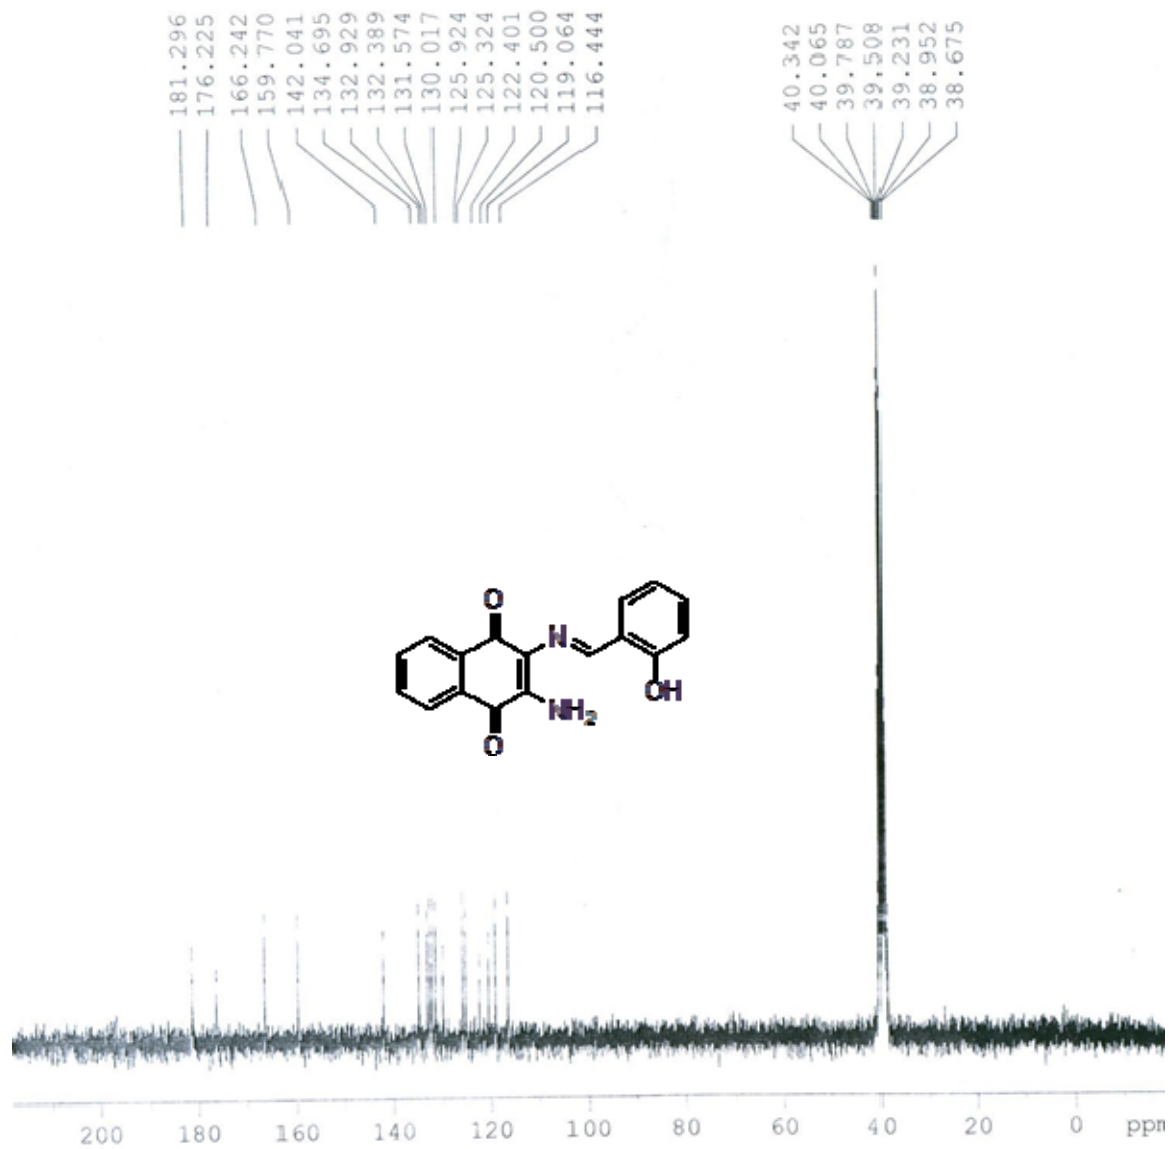

<sup>13</sup>C NMR spectrum of 3a

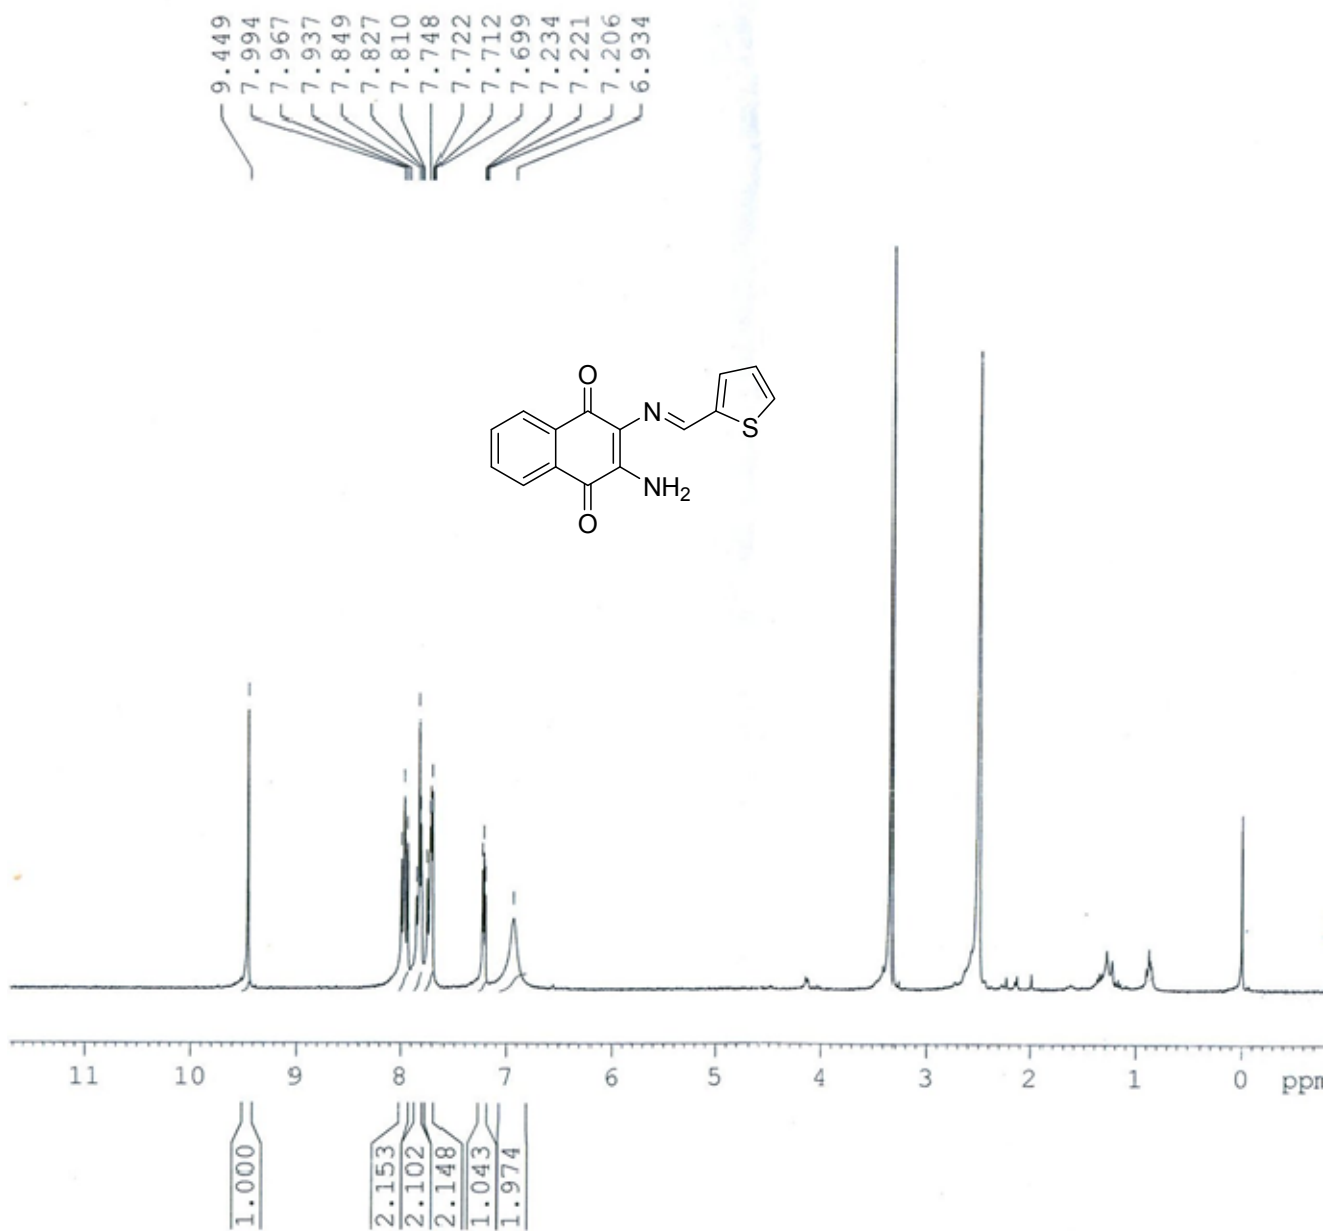

<sup>1</sup>H NMR spectrum of 3b

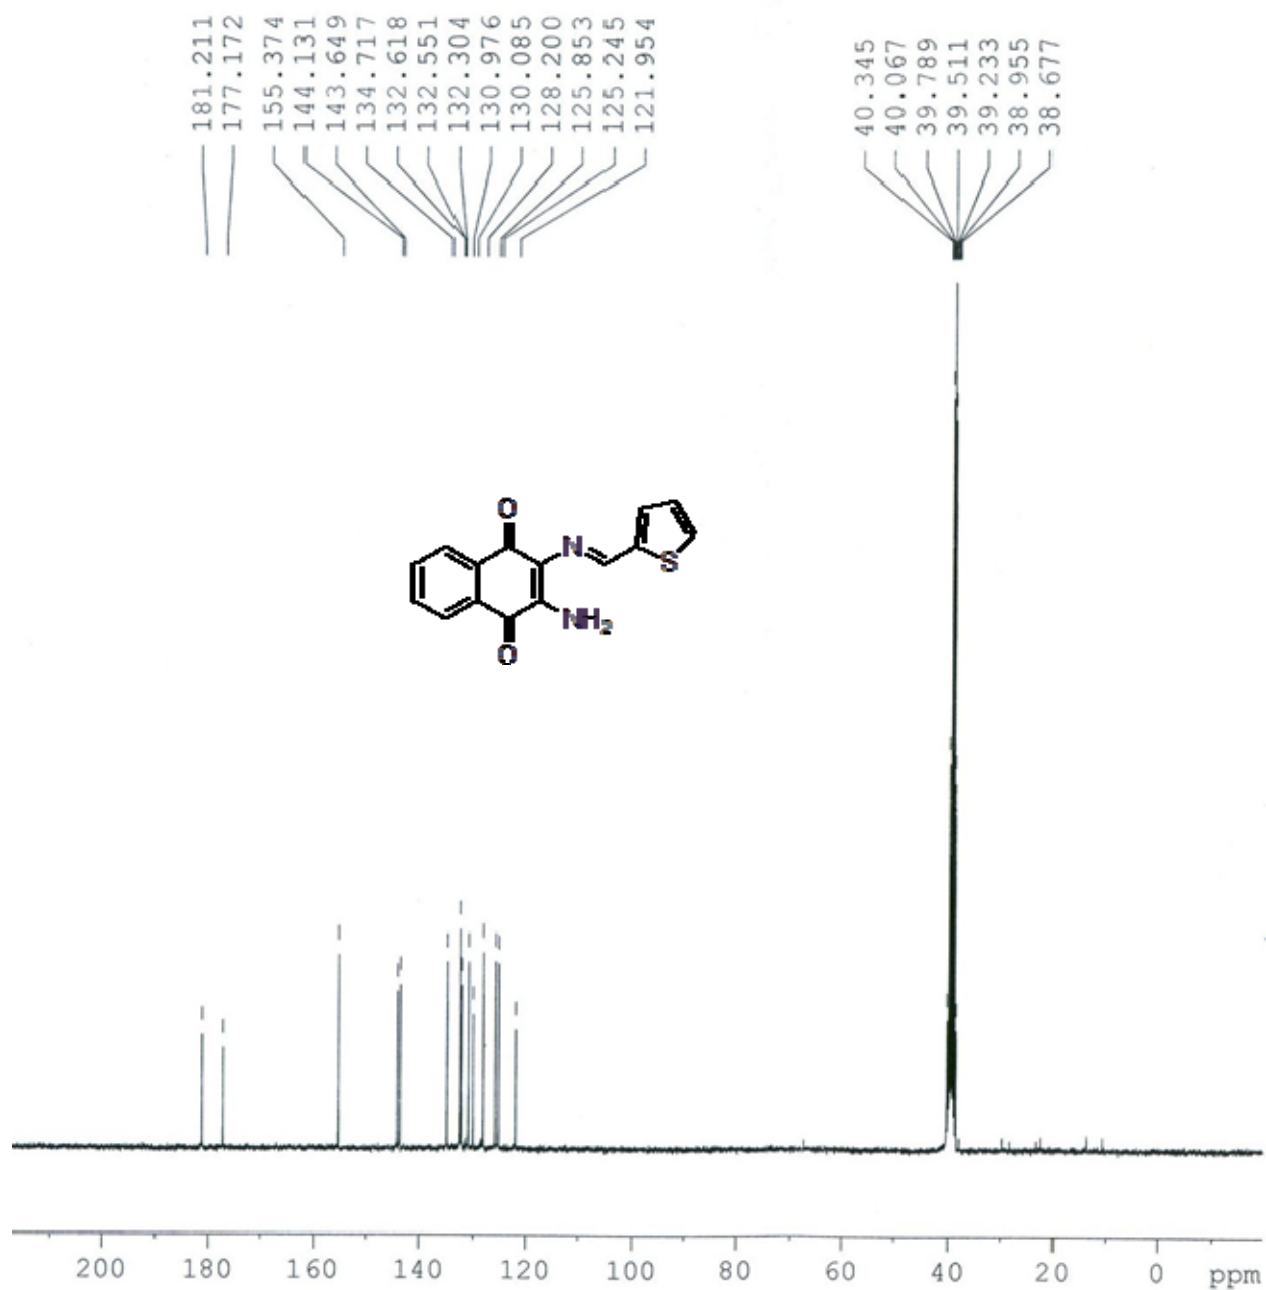

$^{13}\text{C}$  NMR spectrum of 3b

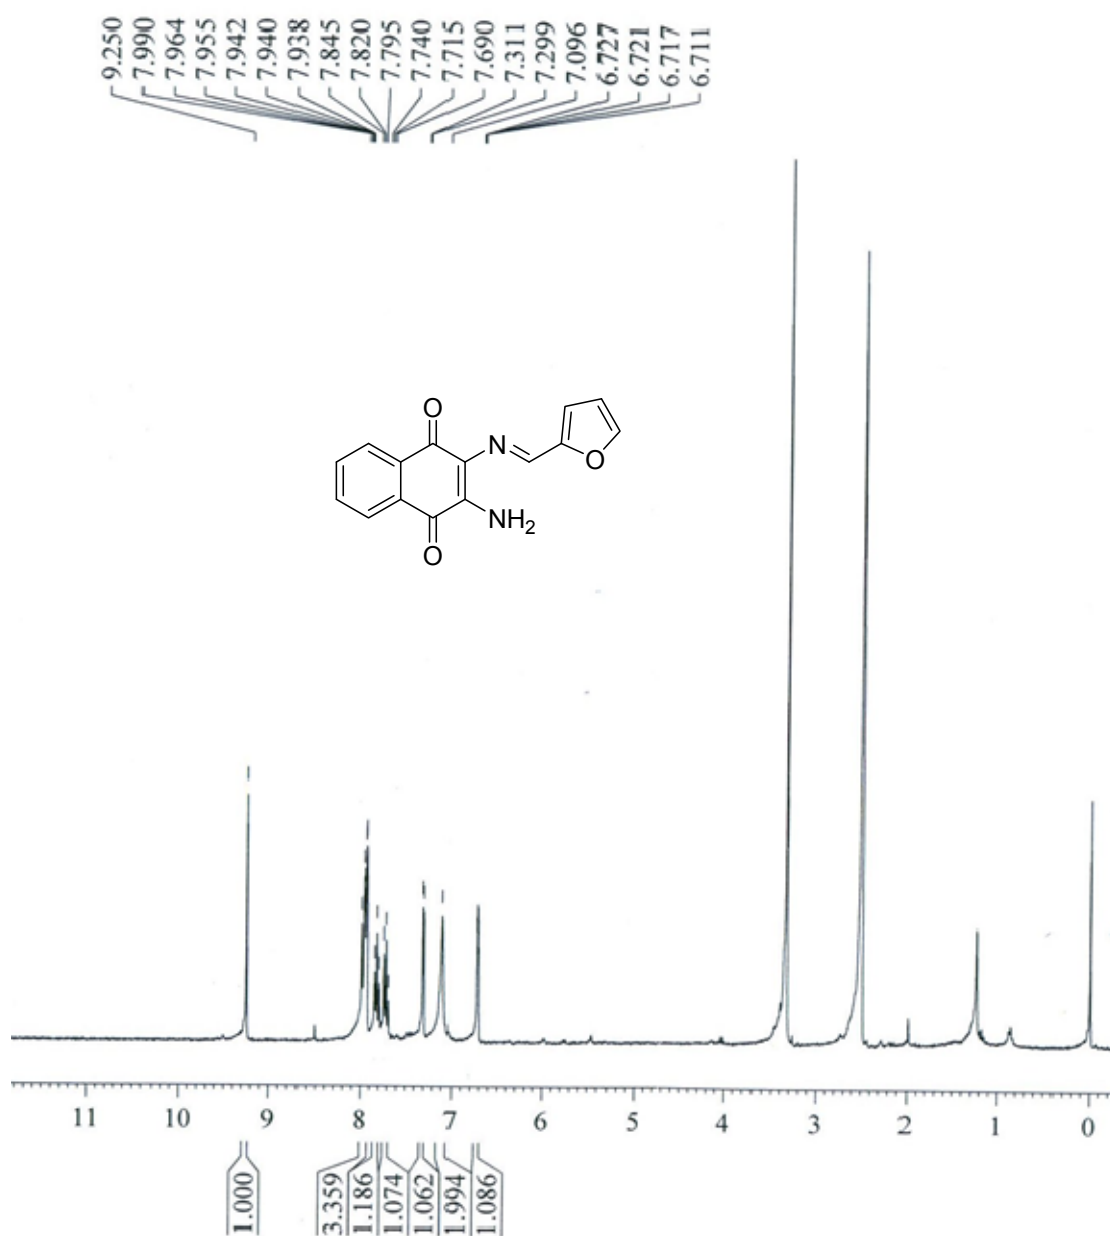

<sup>1</sup>H NMR spectrum of 3c

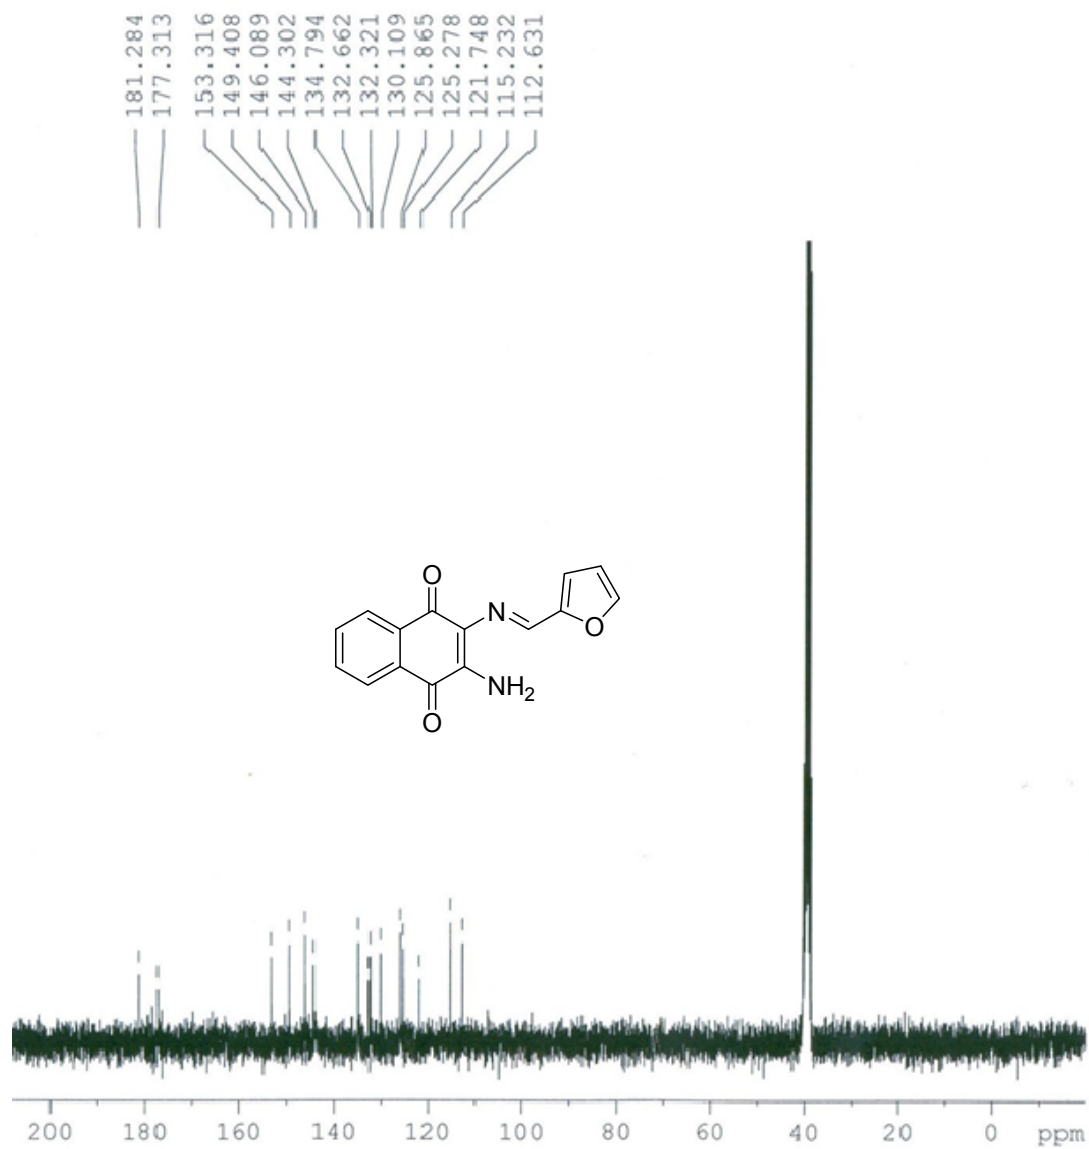

$^{13}\text{C}$  NMR spectrum of **3c**

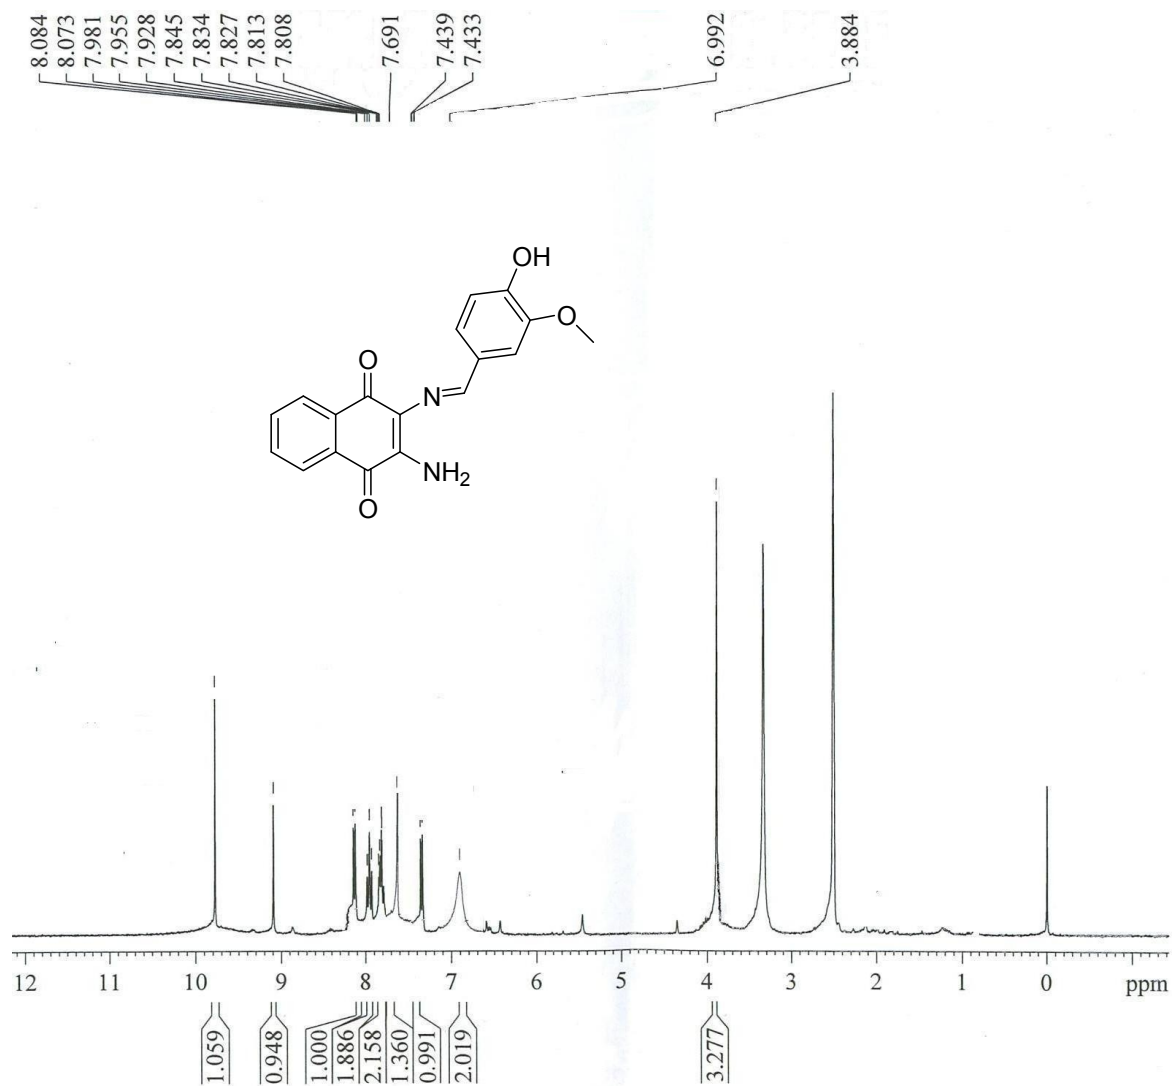

<sup>1</sup>H NMR spectrum of 3d



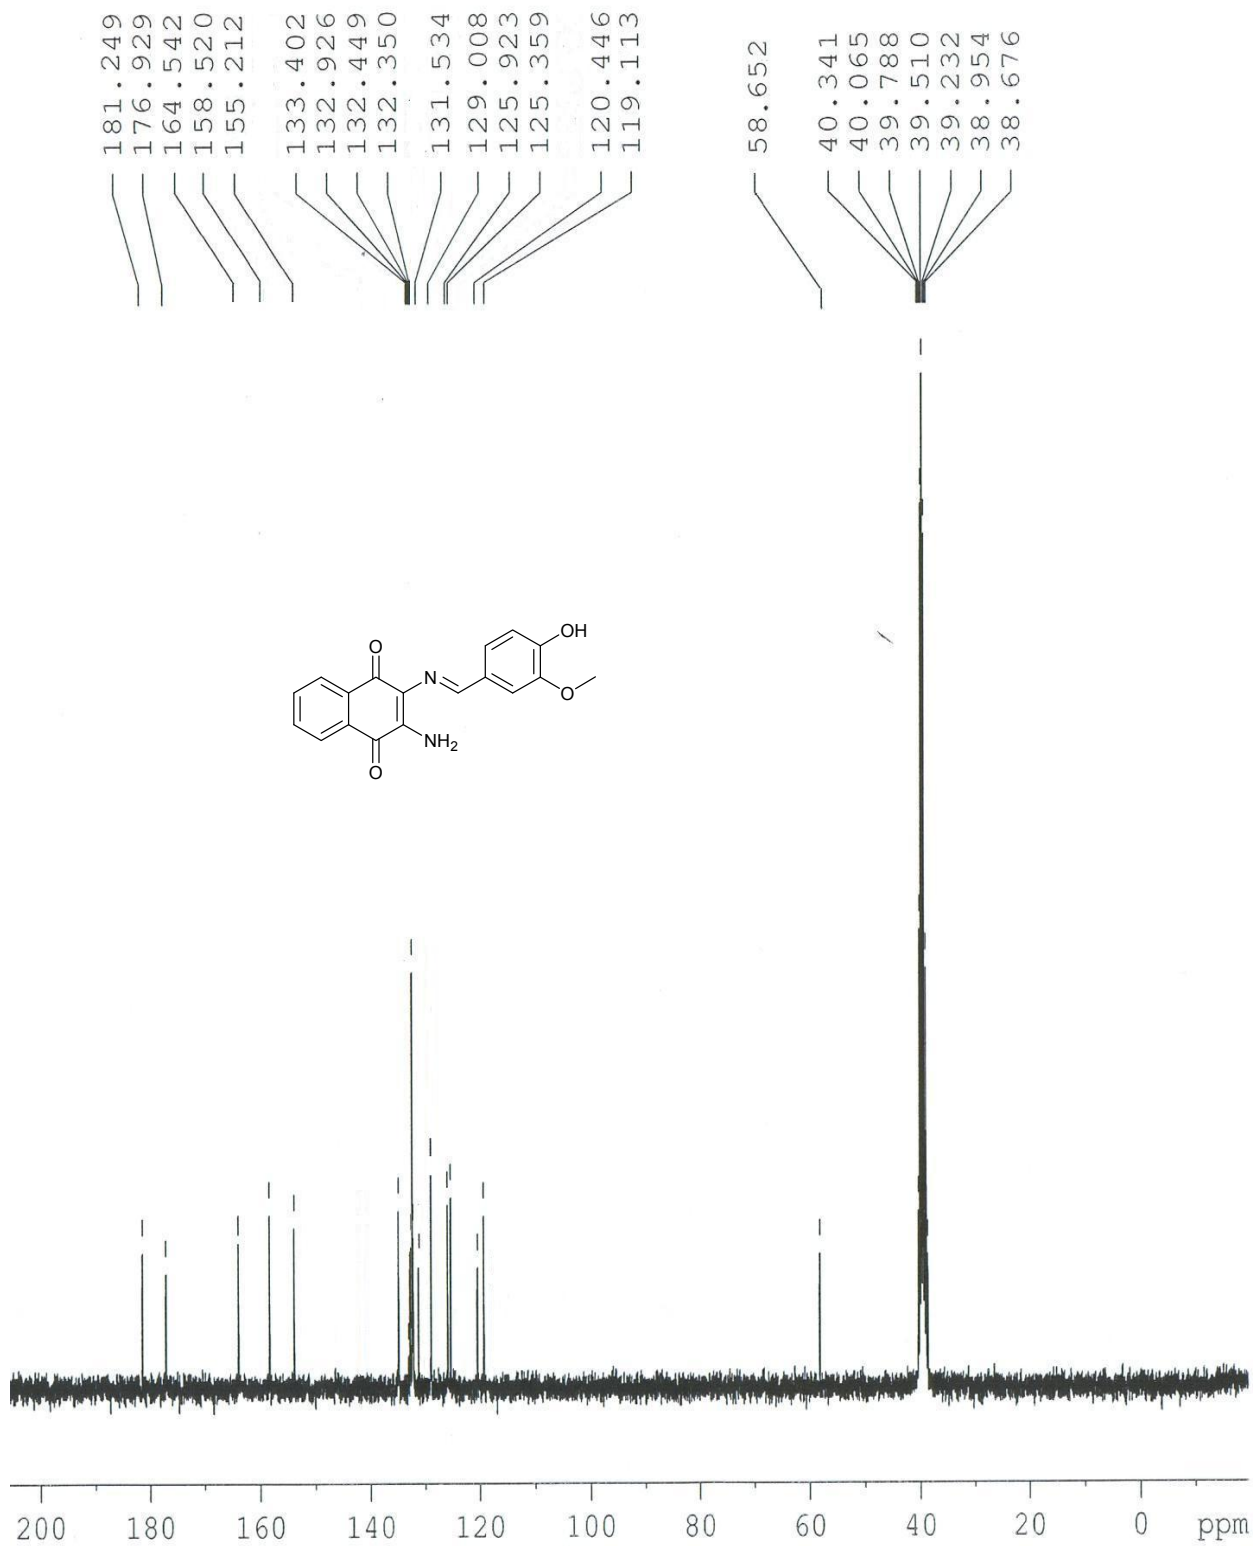

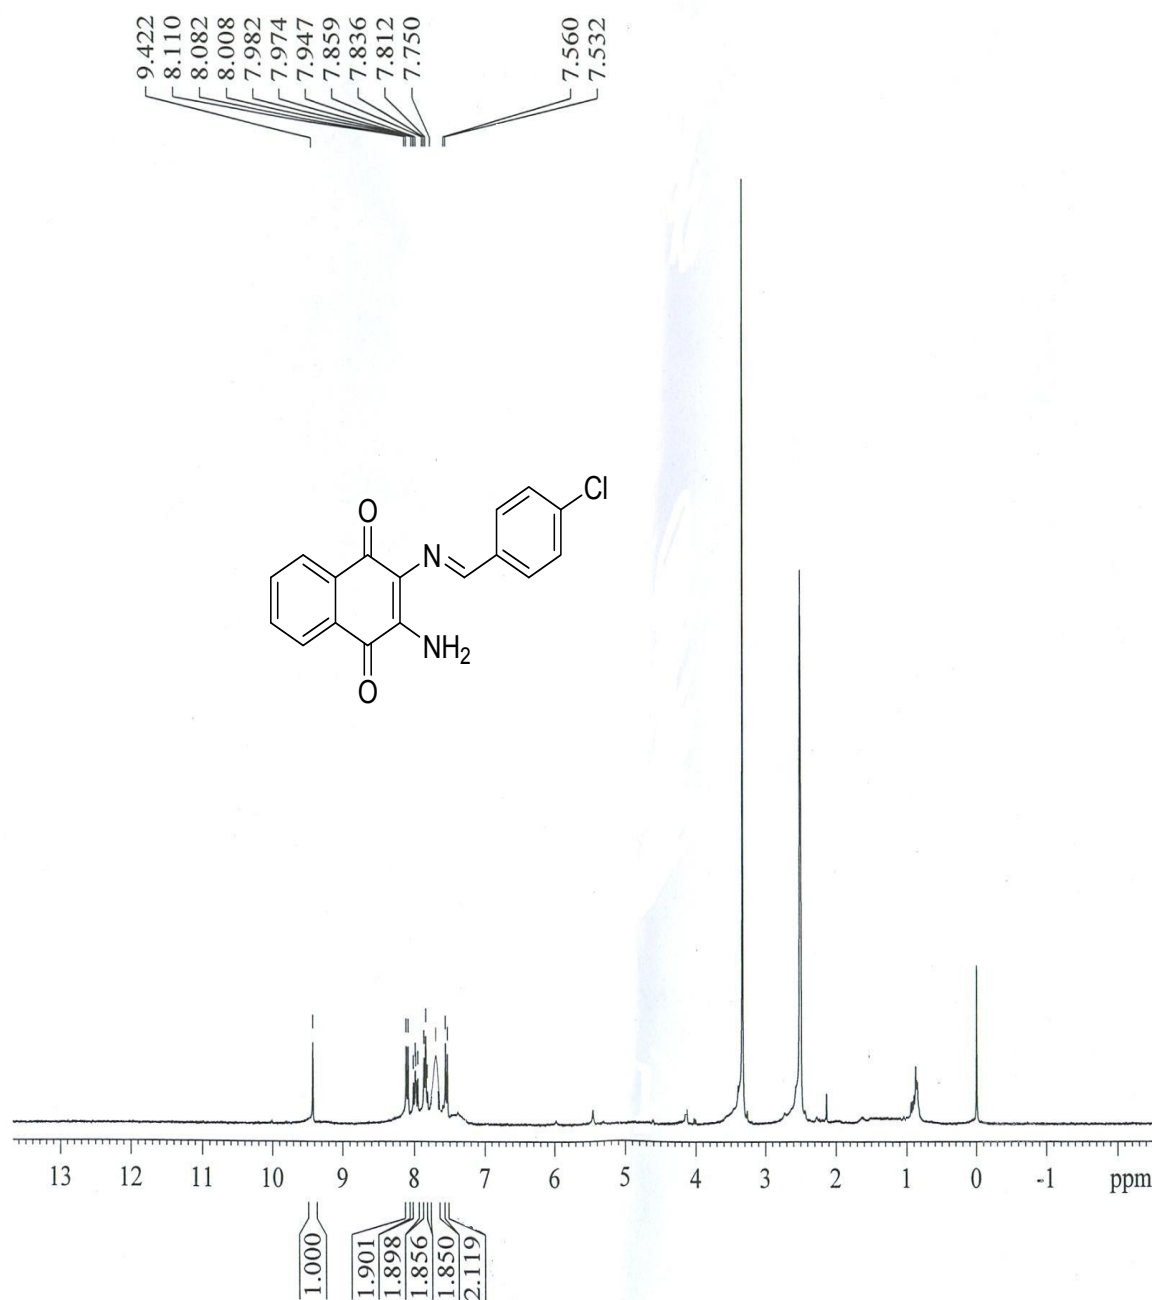

<sup>1</sup>H NMR spectrum of 3e

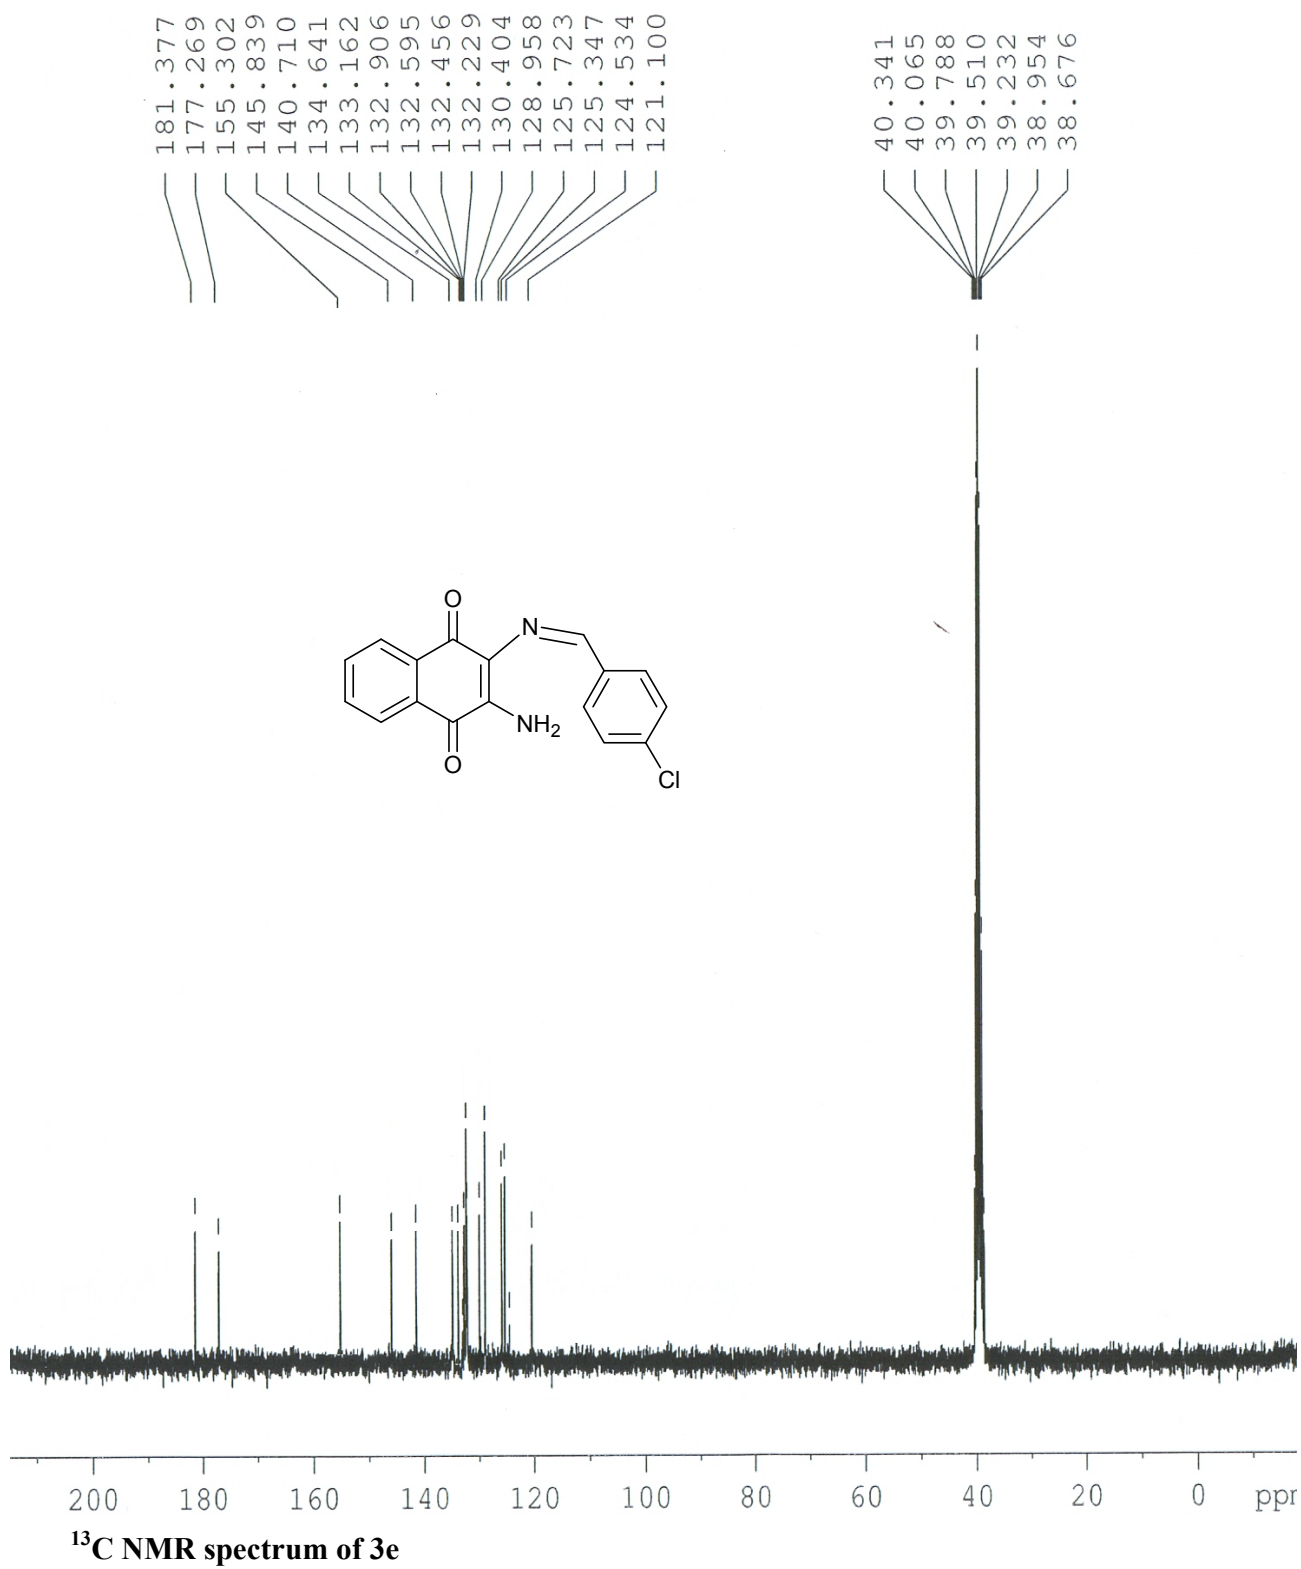

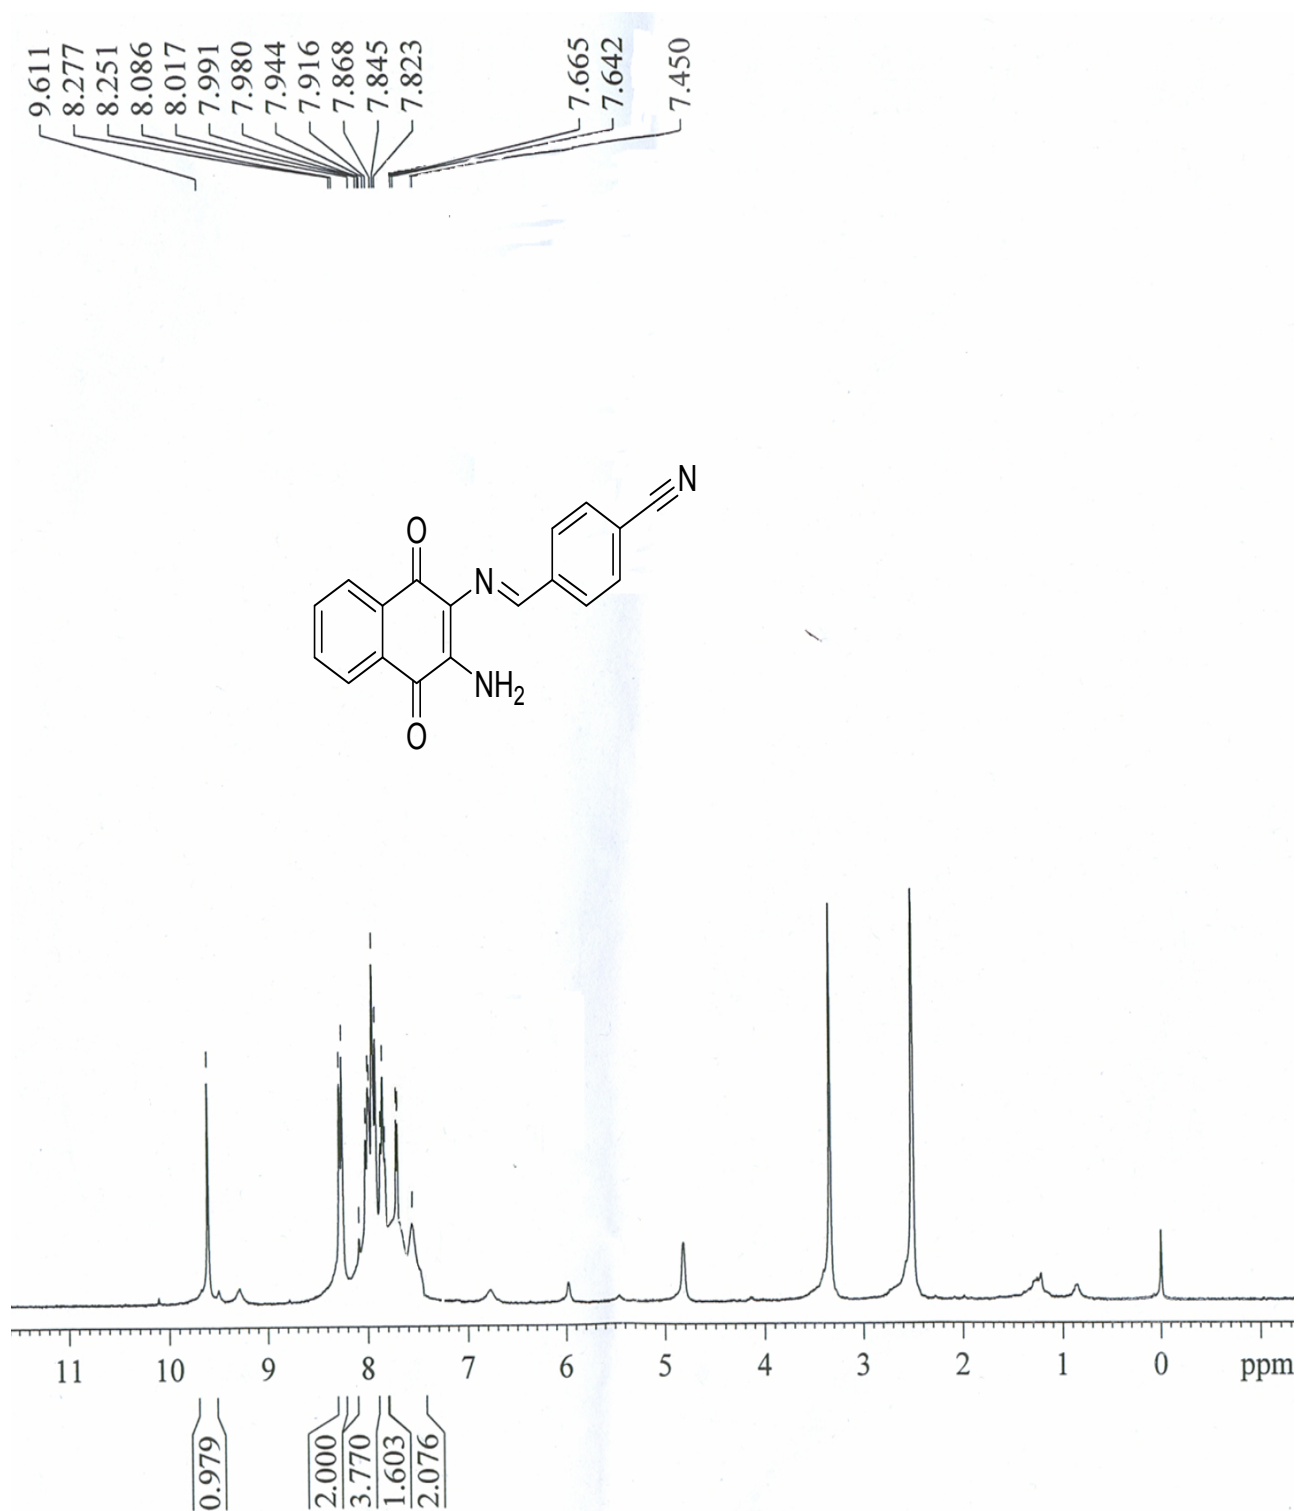

$^1\text{H}$  NMR spectrum of 3f

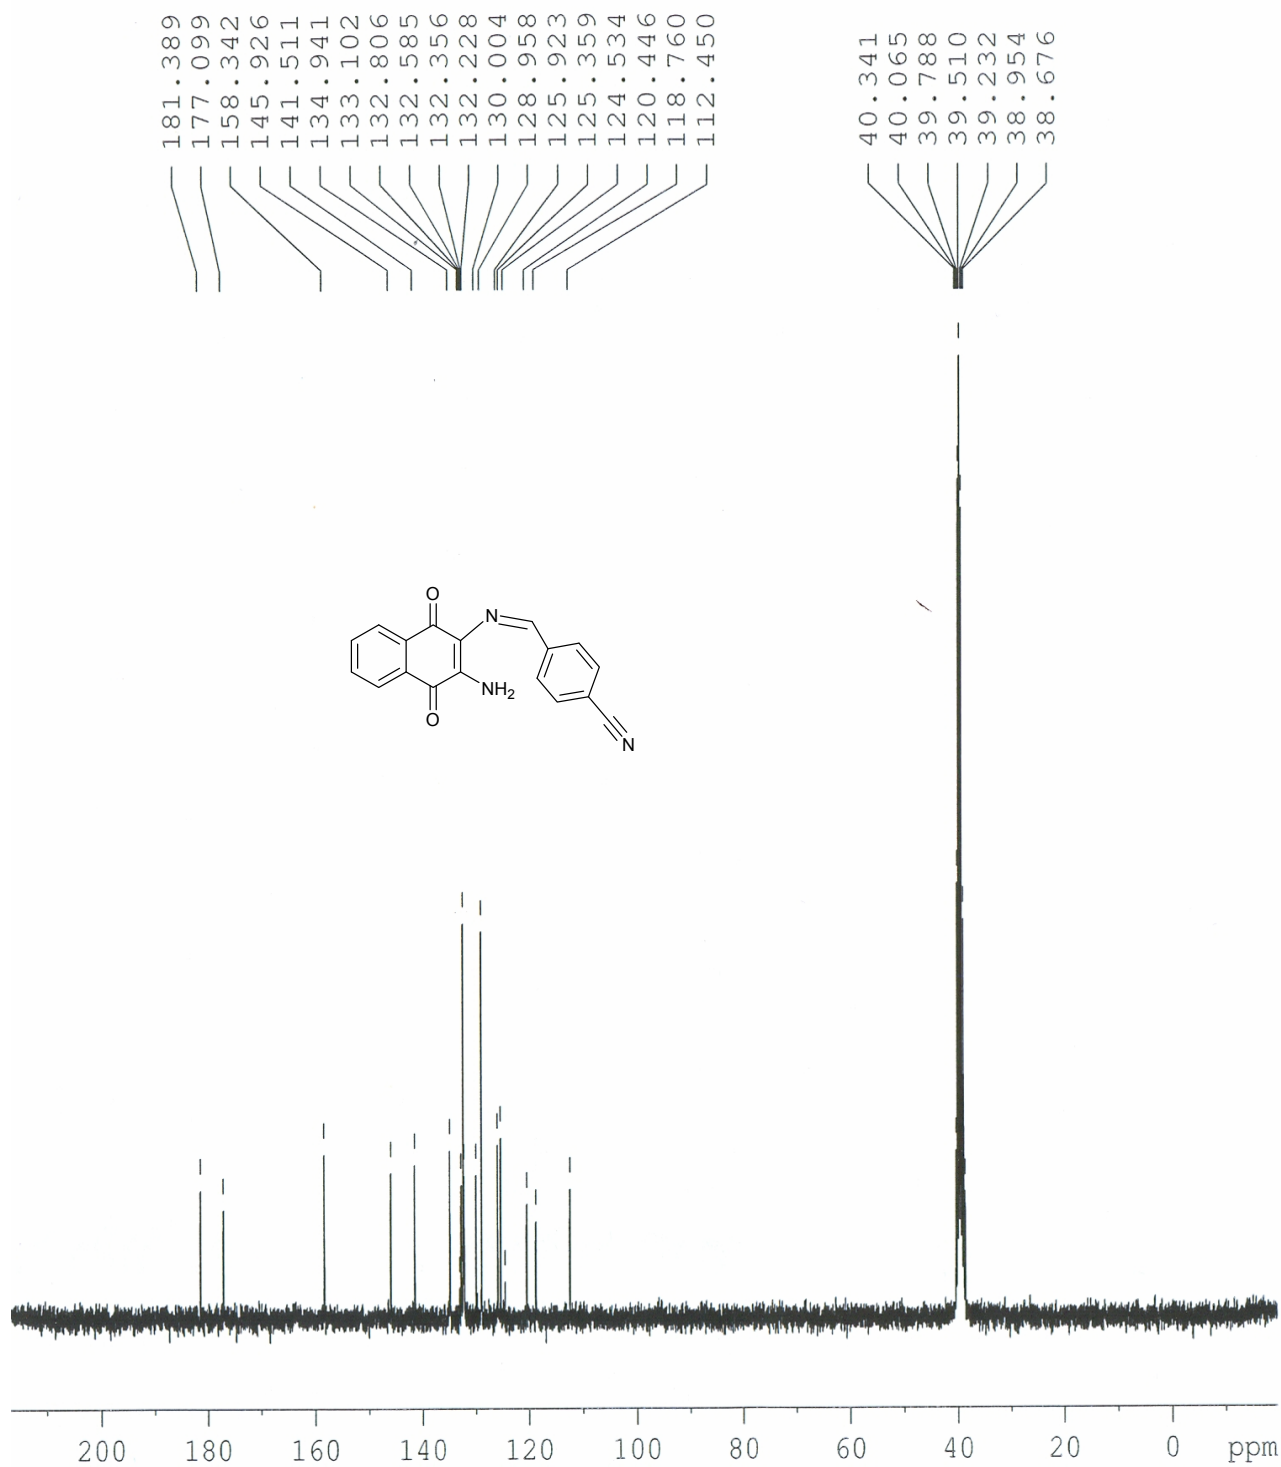

<sup>13</sup>C NMR spectrum of 3f

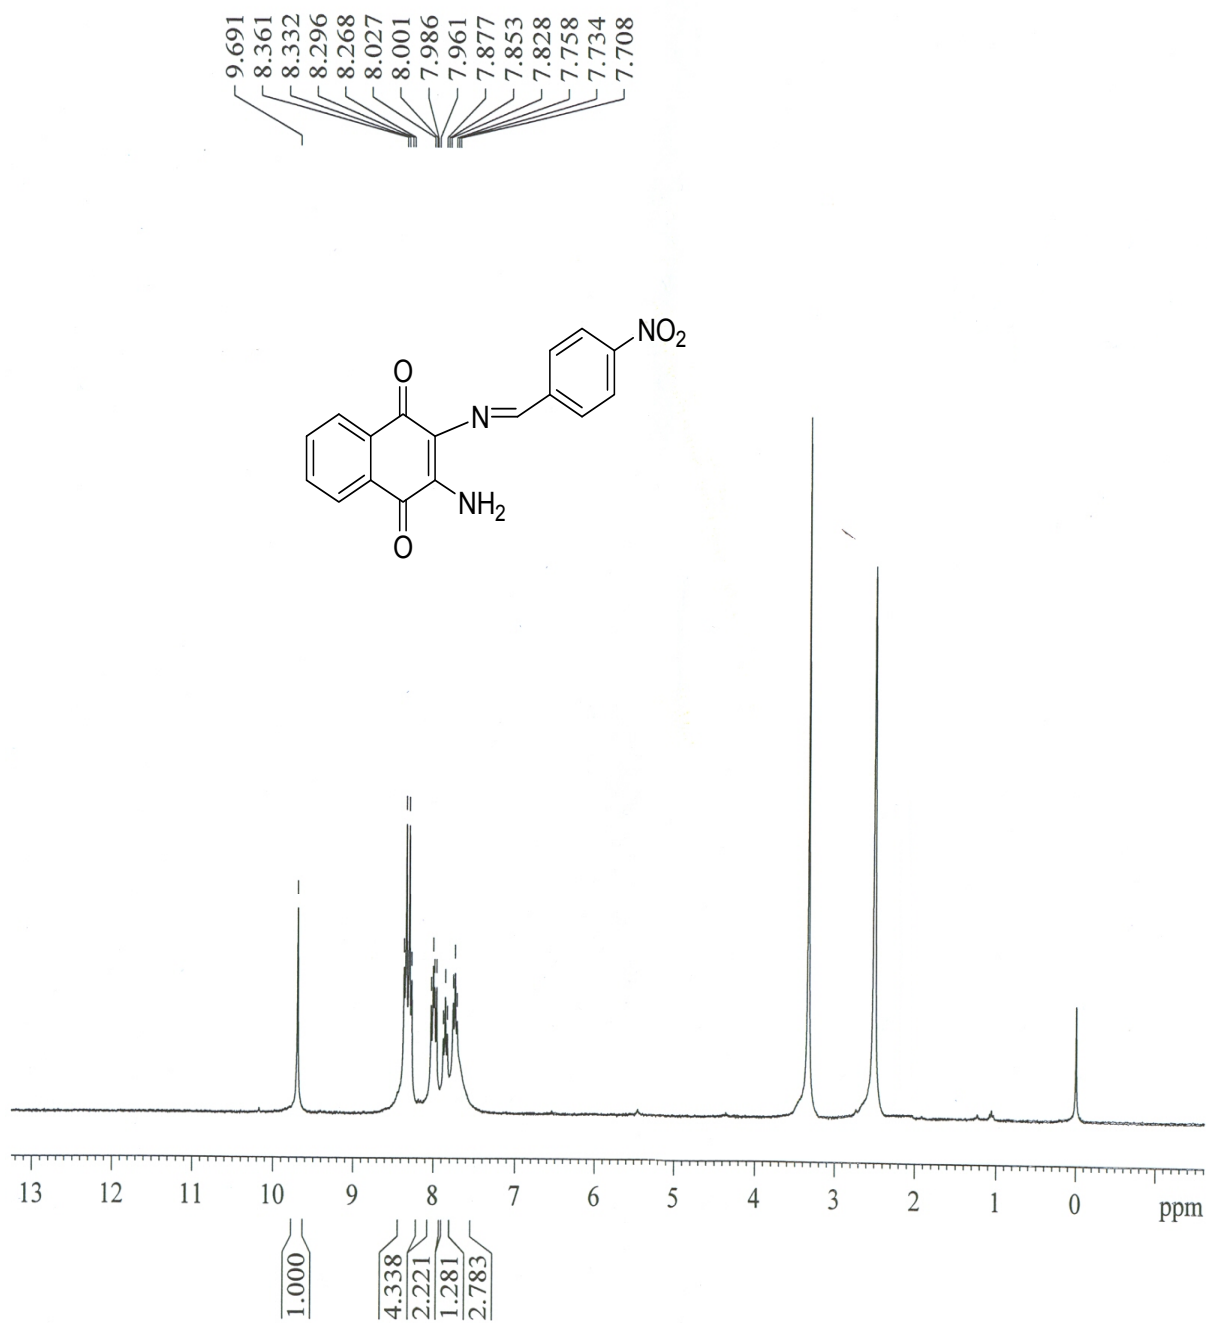

<sup>1</sup>H NMR spectrum of 3g

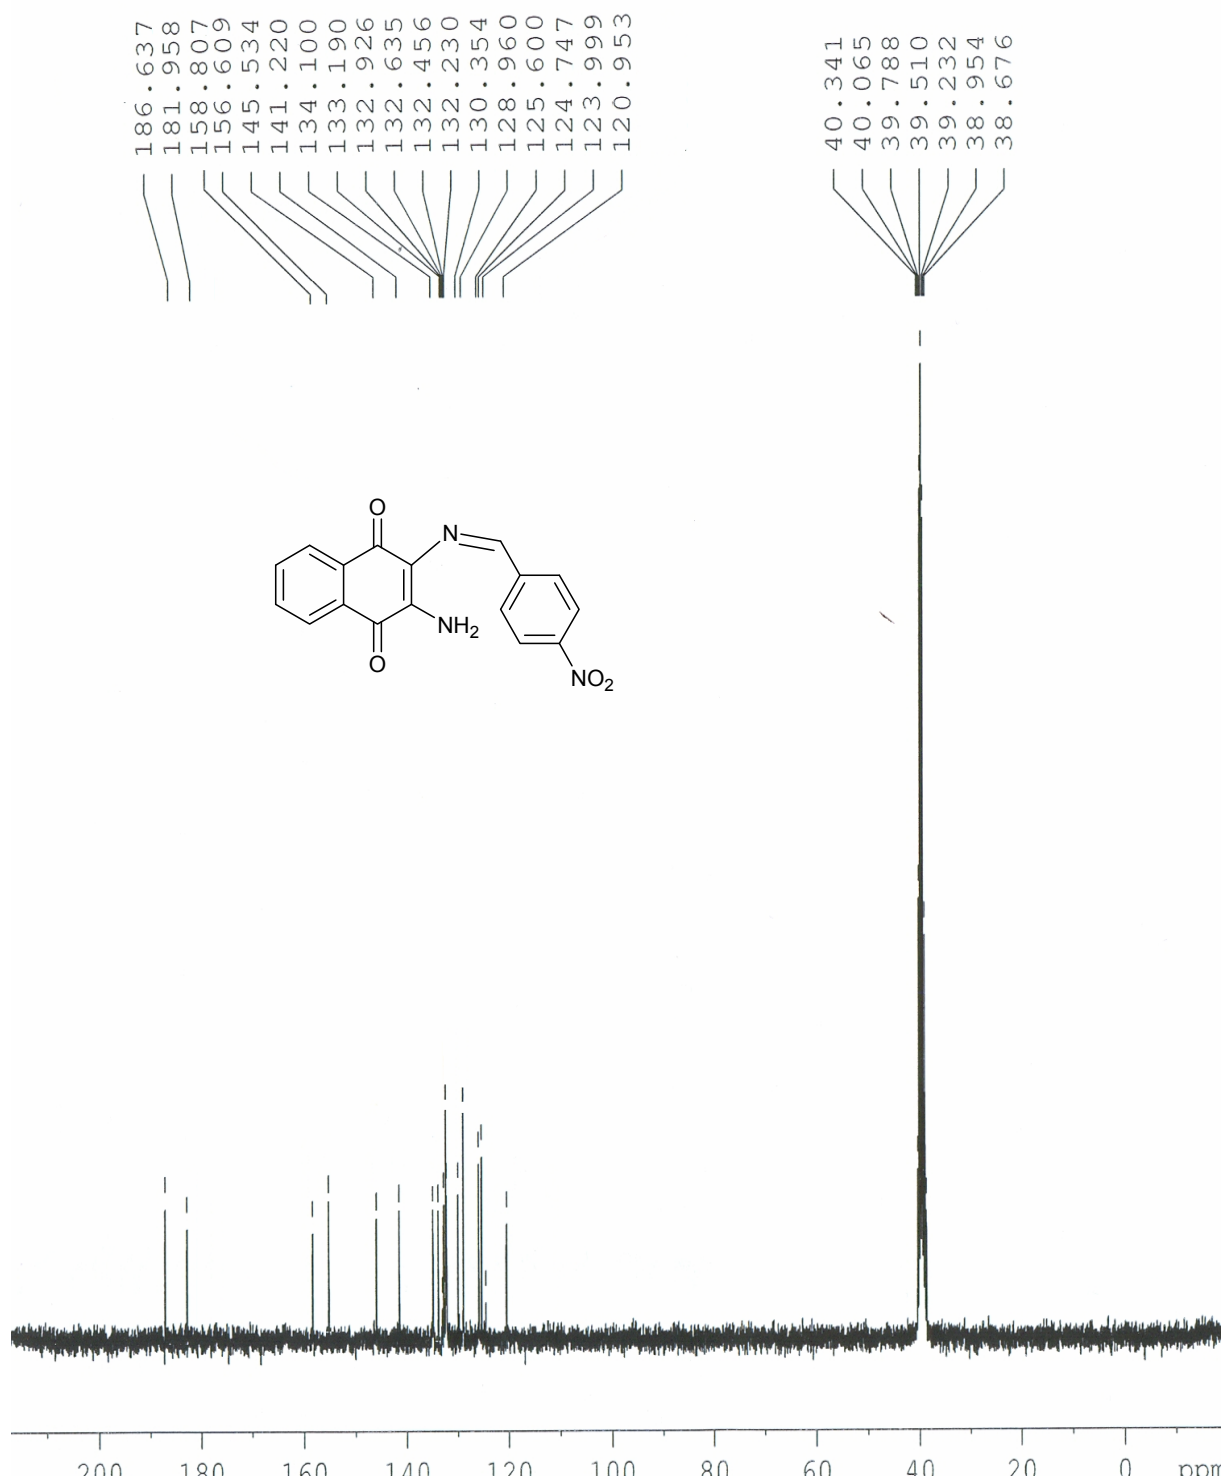

$^{13}\text{C}$  NMR spectrum of 3g

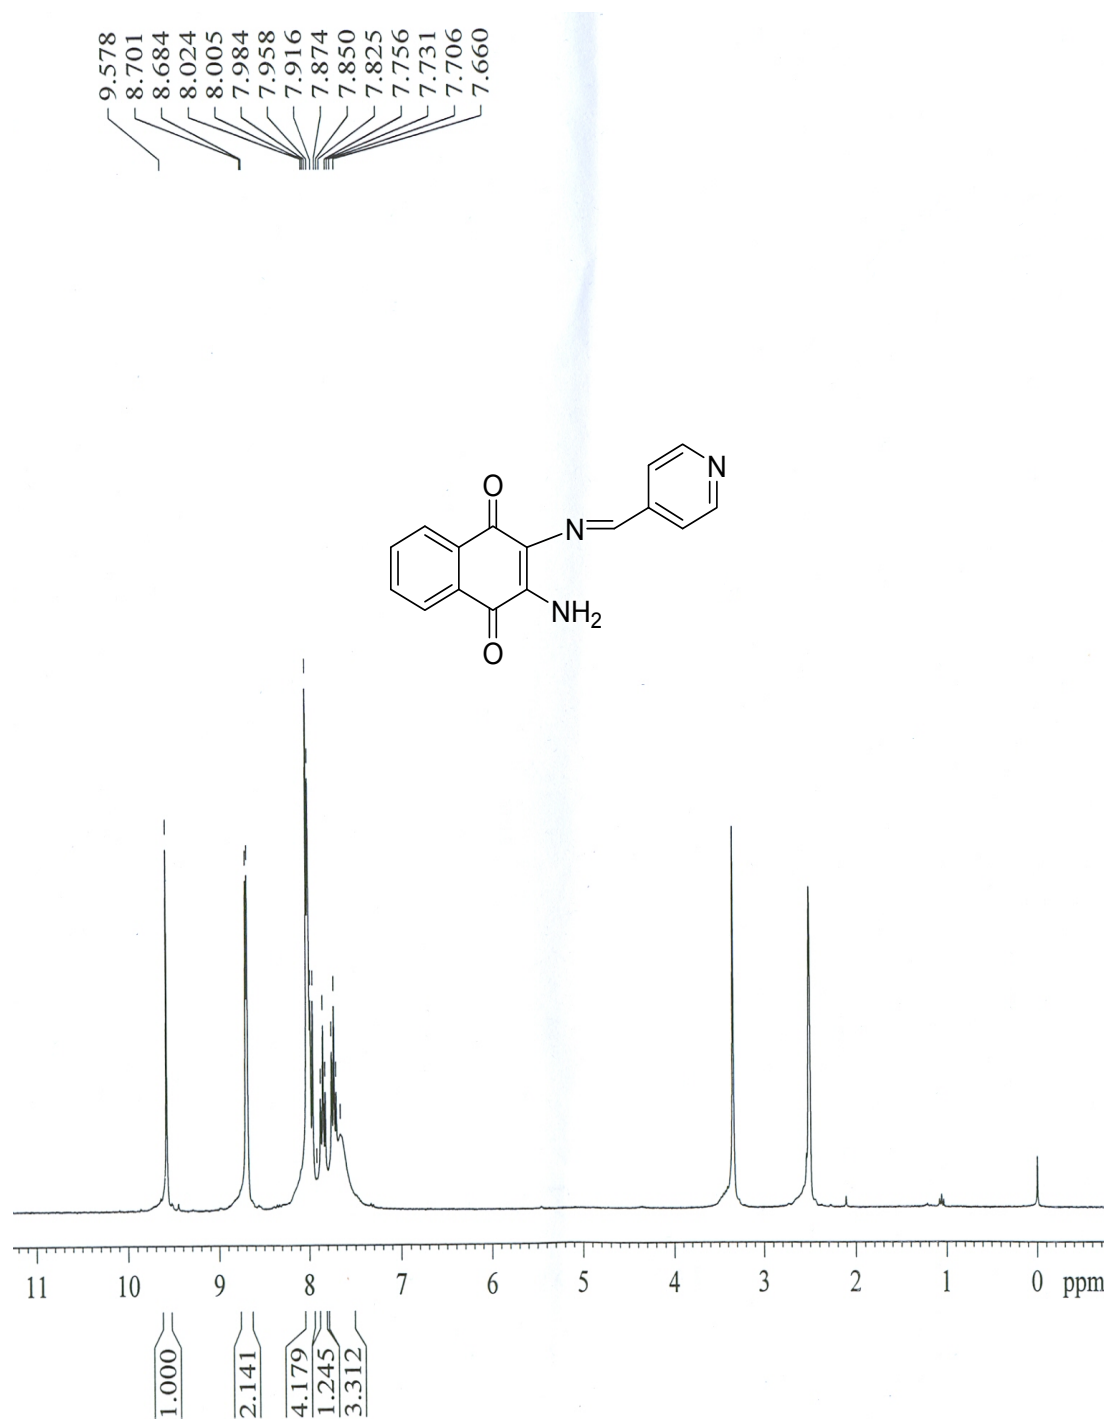

$^1\text{H}$  NMR spectrum of **3h**



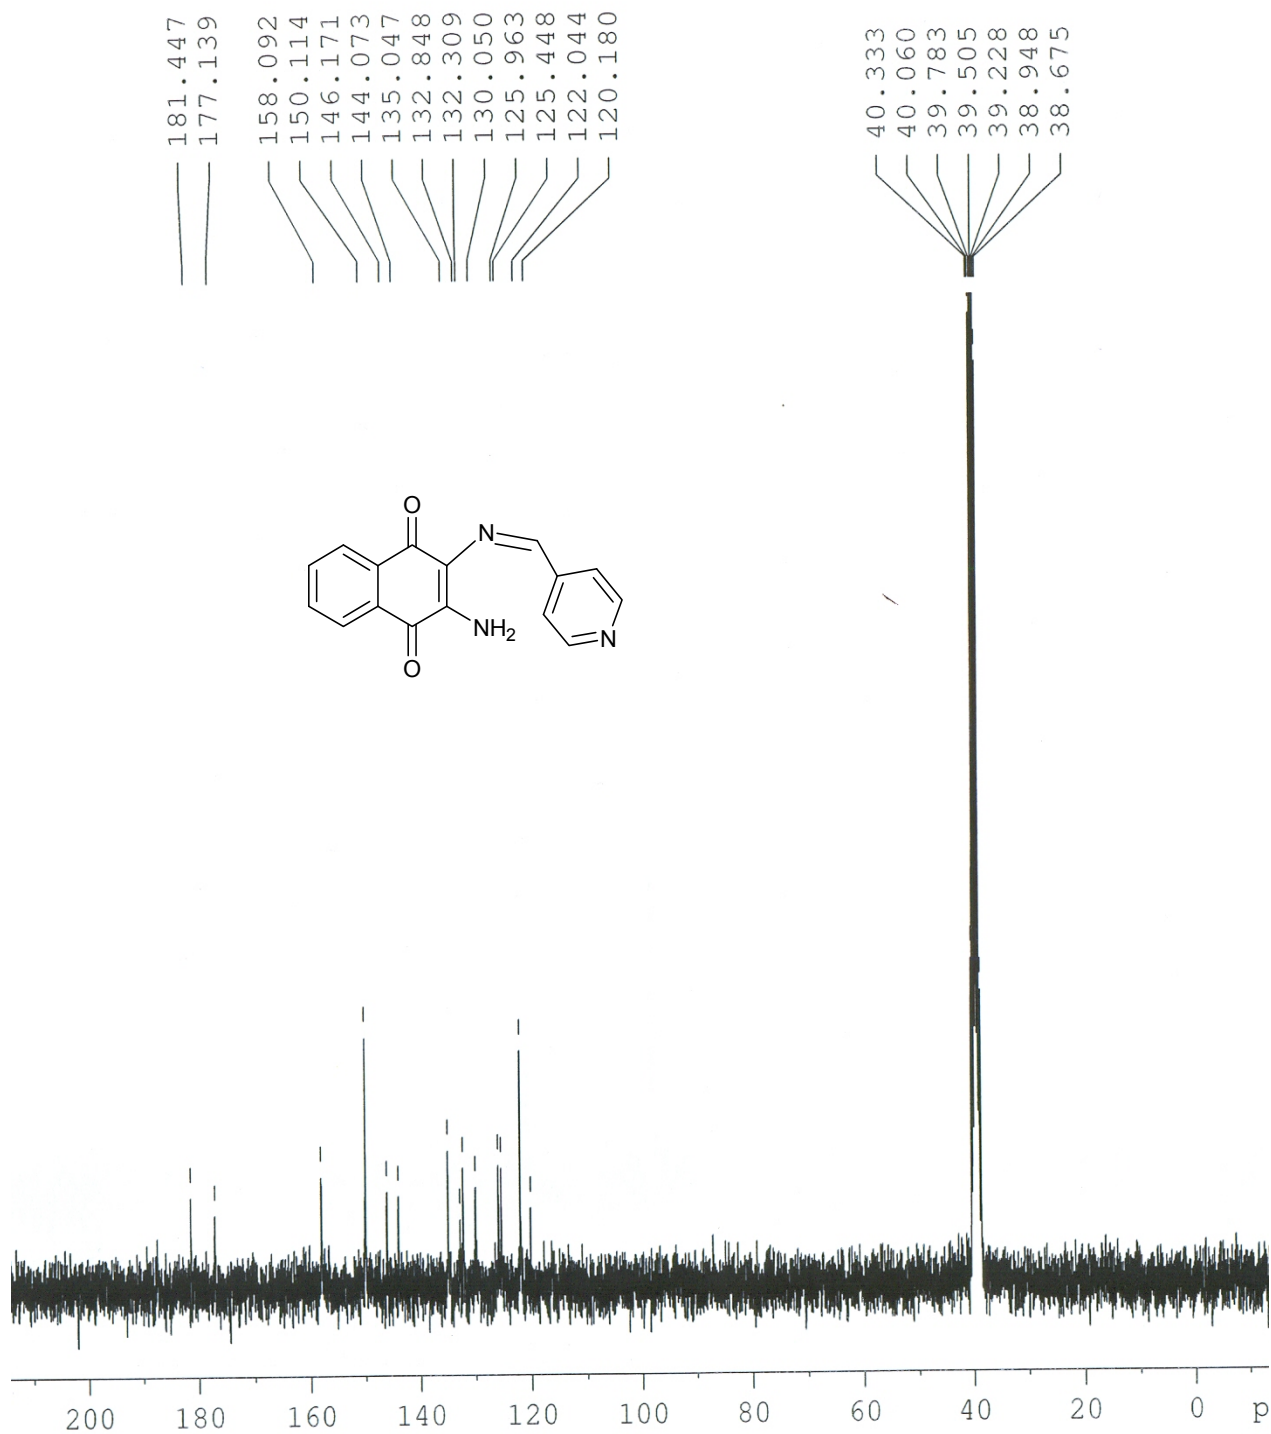

<sup>13</sup>C NMR spectrum of 3h

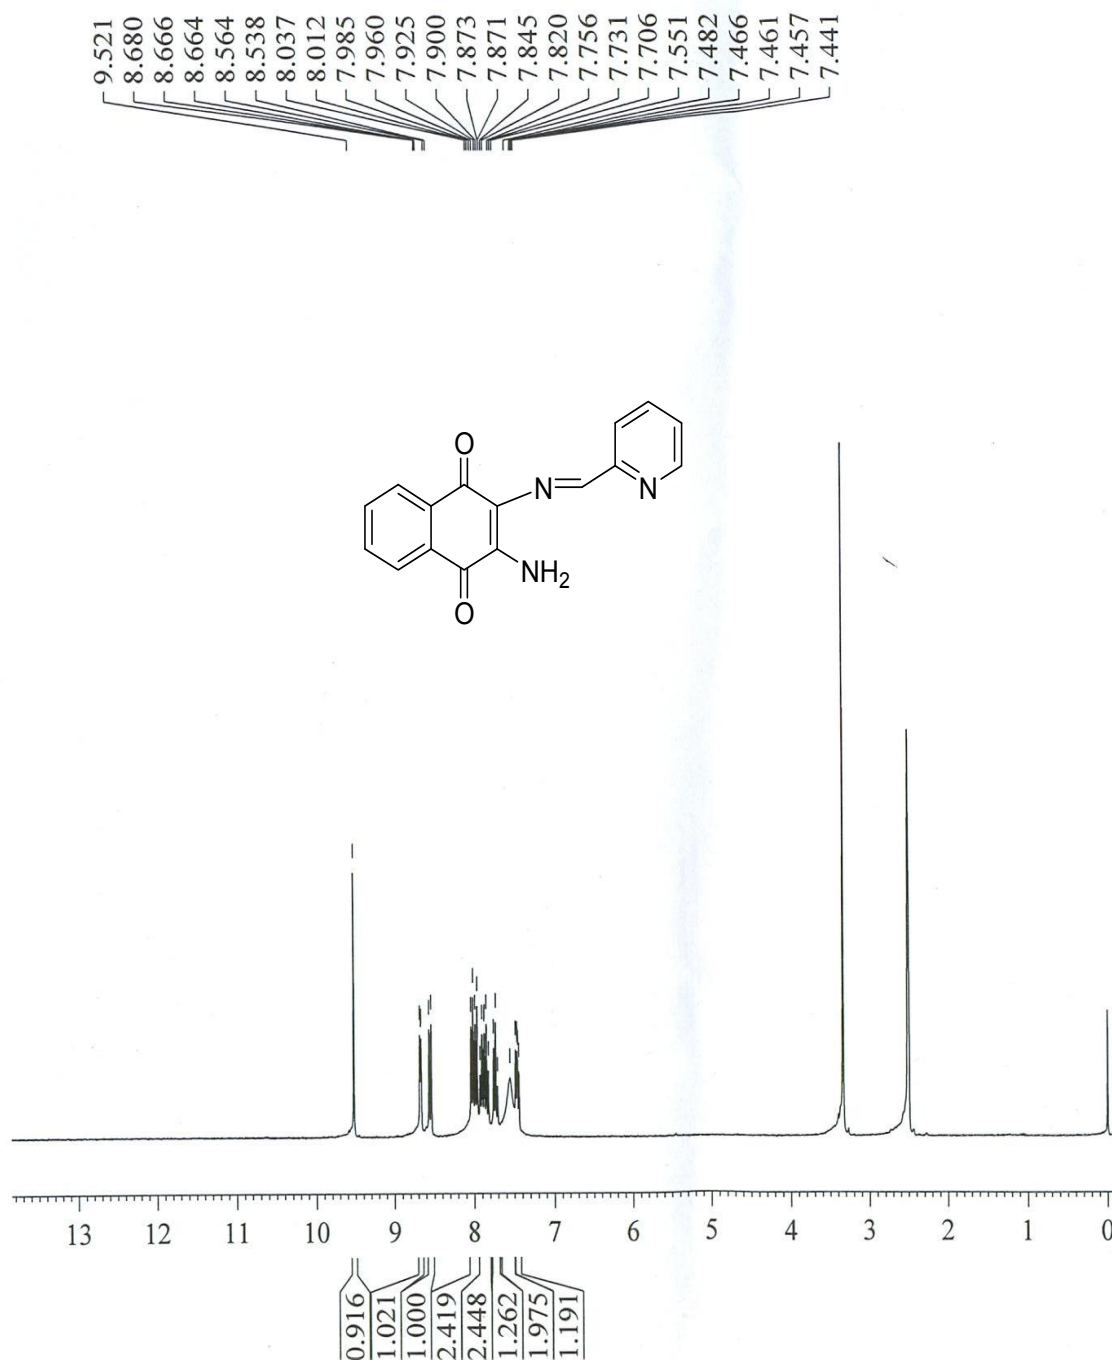

<sup>1</sup>H NMR spectrum of 3i

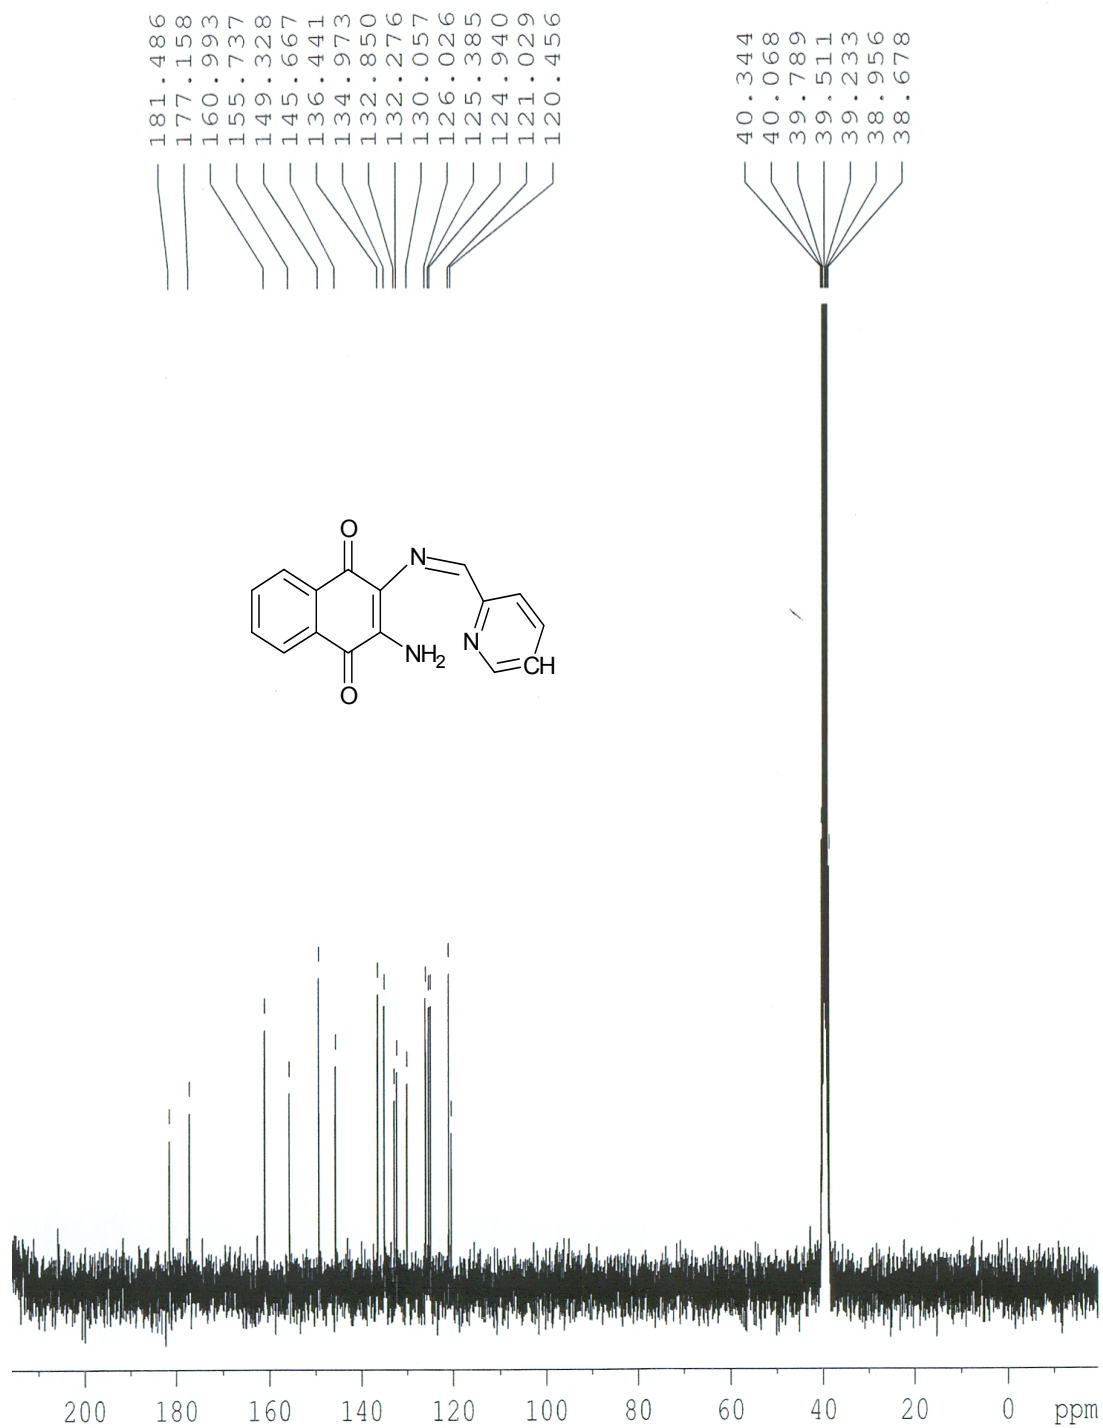

<sup>13</sup>C NMR spectrum of 3i

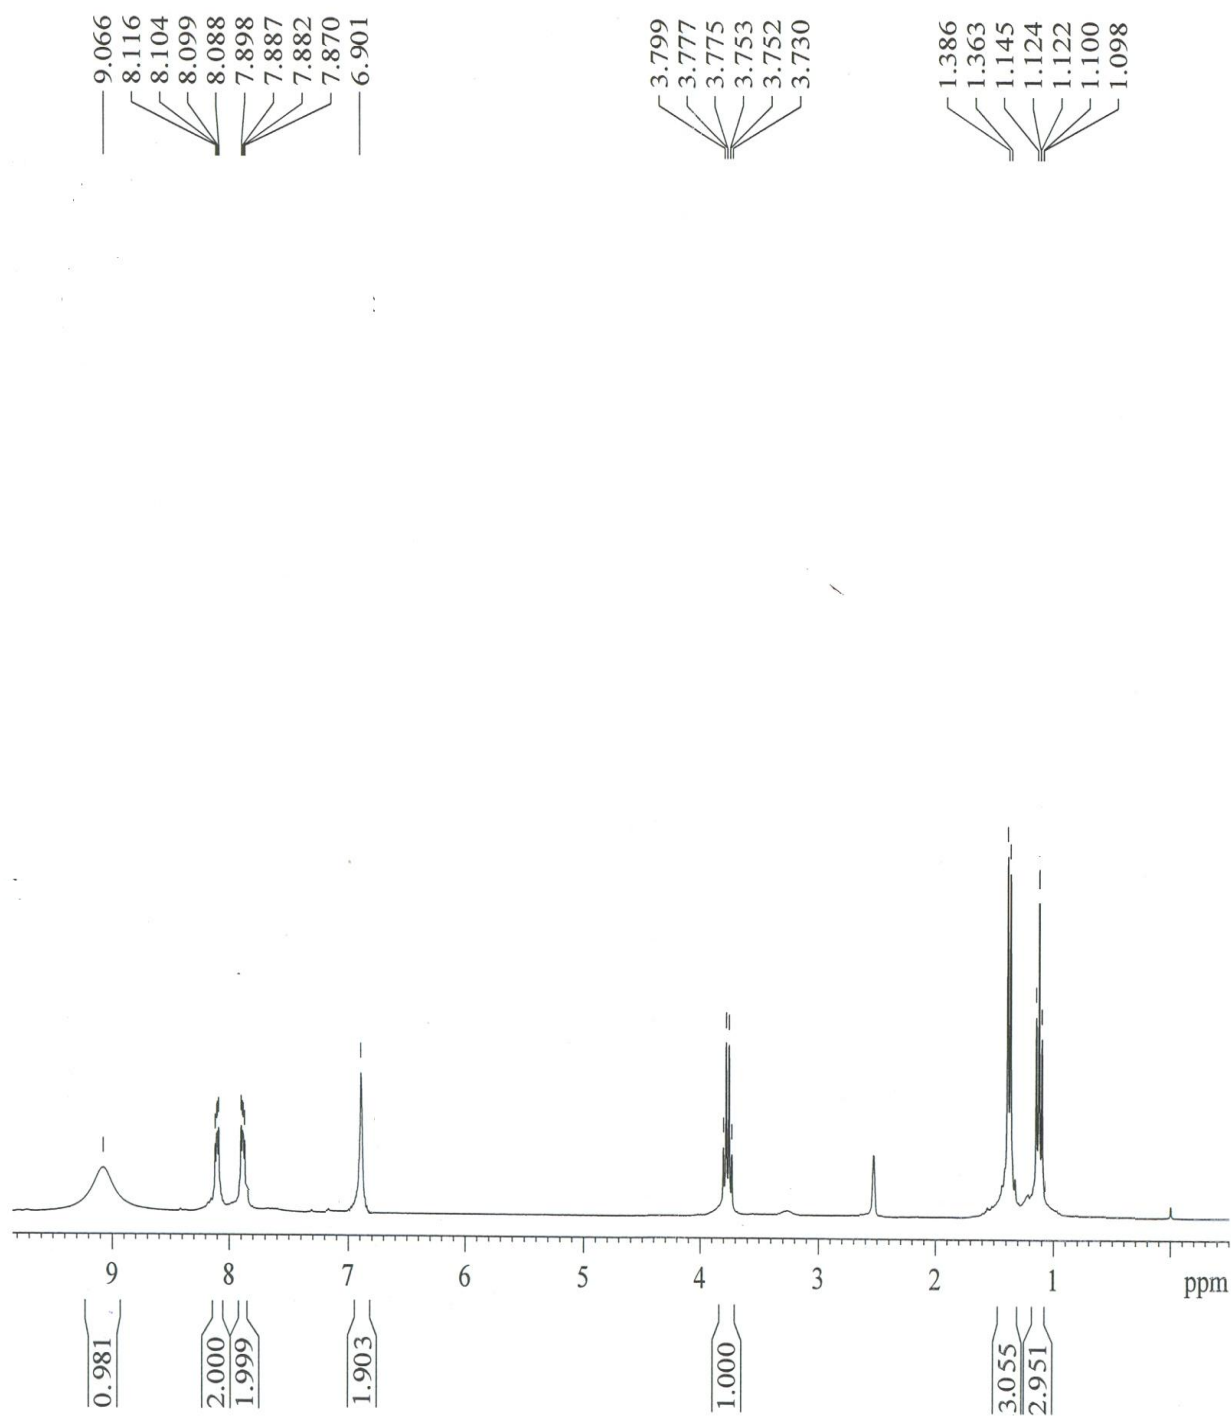

$^1\text{H}$  NMR spectrum of 3j

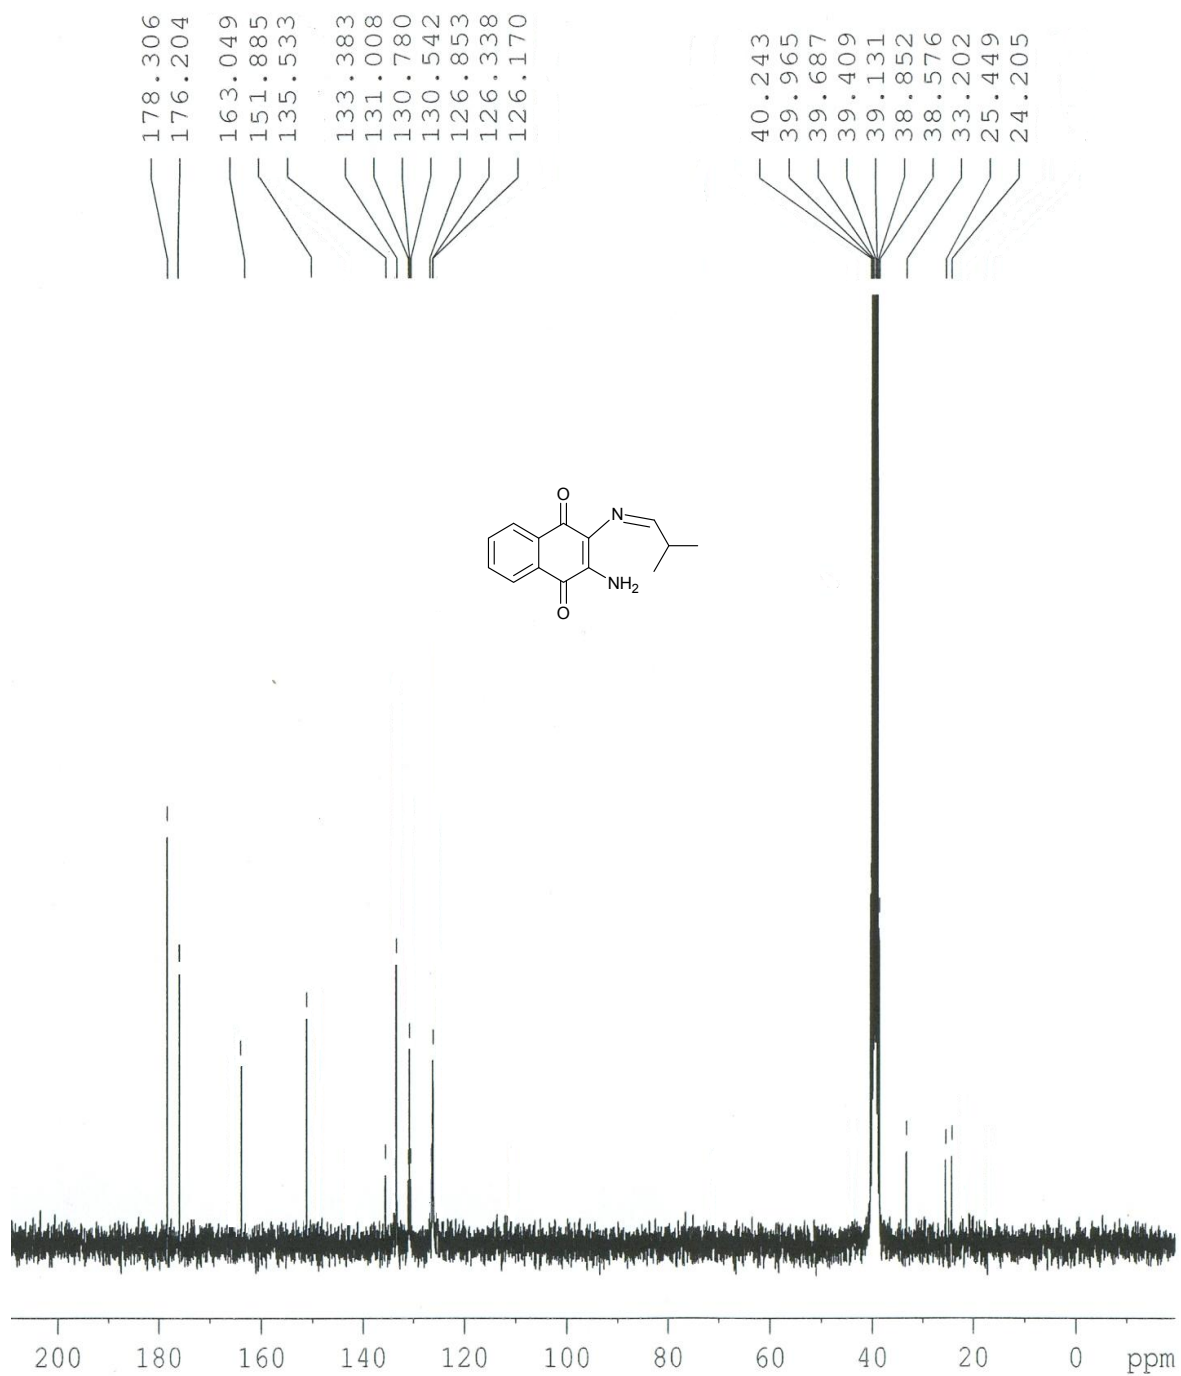

$^{13}\text{C}$  NMR spectrum of **3j**

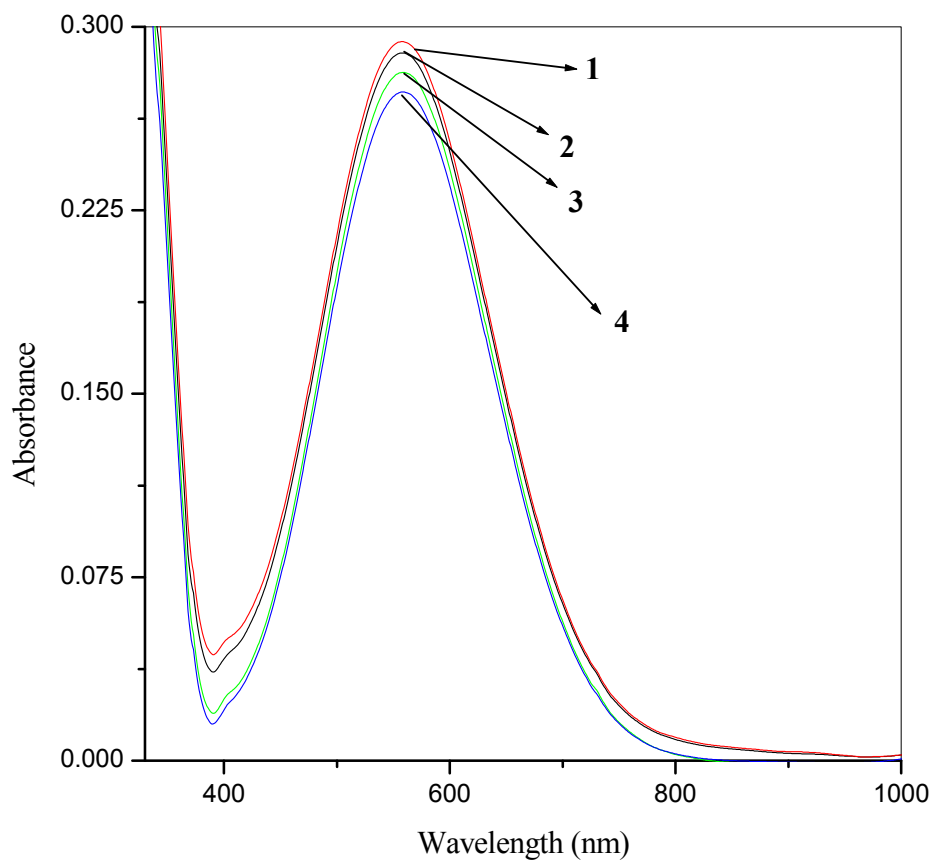

**Figure. 1S.** Concentration variation spectra for the HMB-DANQ system in ethanol at 298 K.  $[A] = 2.5 \times 10^{-5} \text{ M}$ ;  $[D]$ : 1) 1.25, 2) 1.00, 3) 0.75, 4) 0.50, 5)  $0.25 \times 10^{-3} \text{ M}$ .

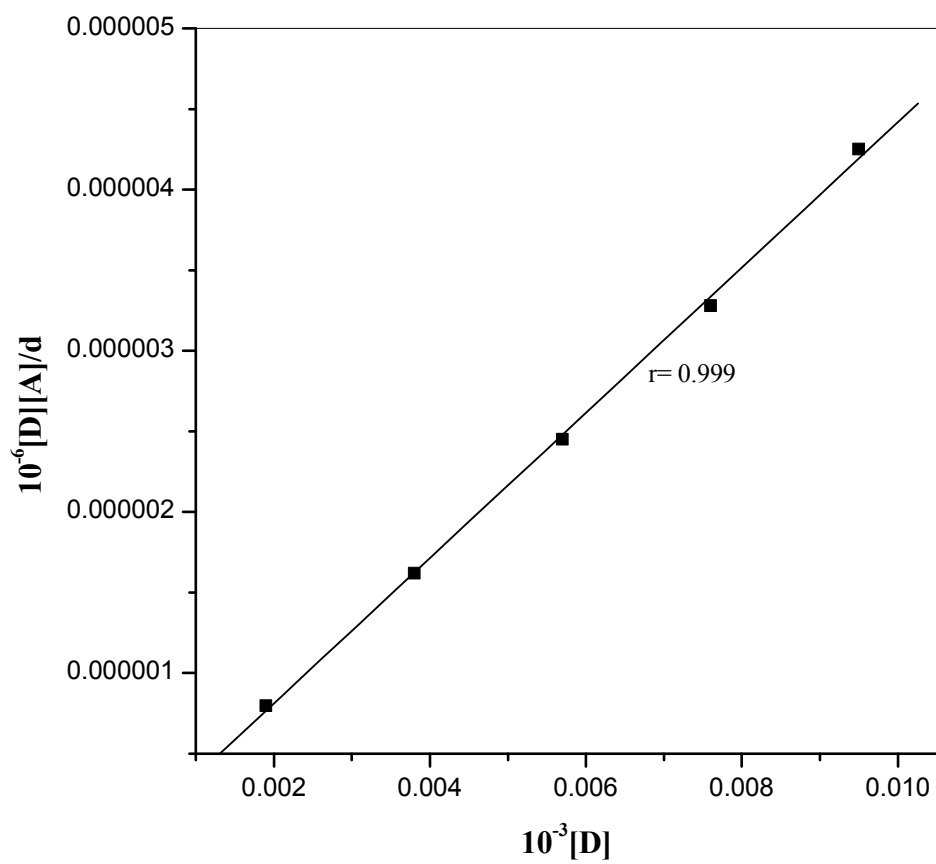

**Figure 2S.** Scott linear plot for HMB-DANQ system in ethanol at 298 K.

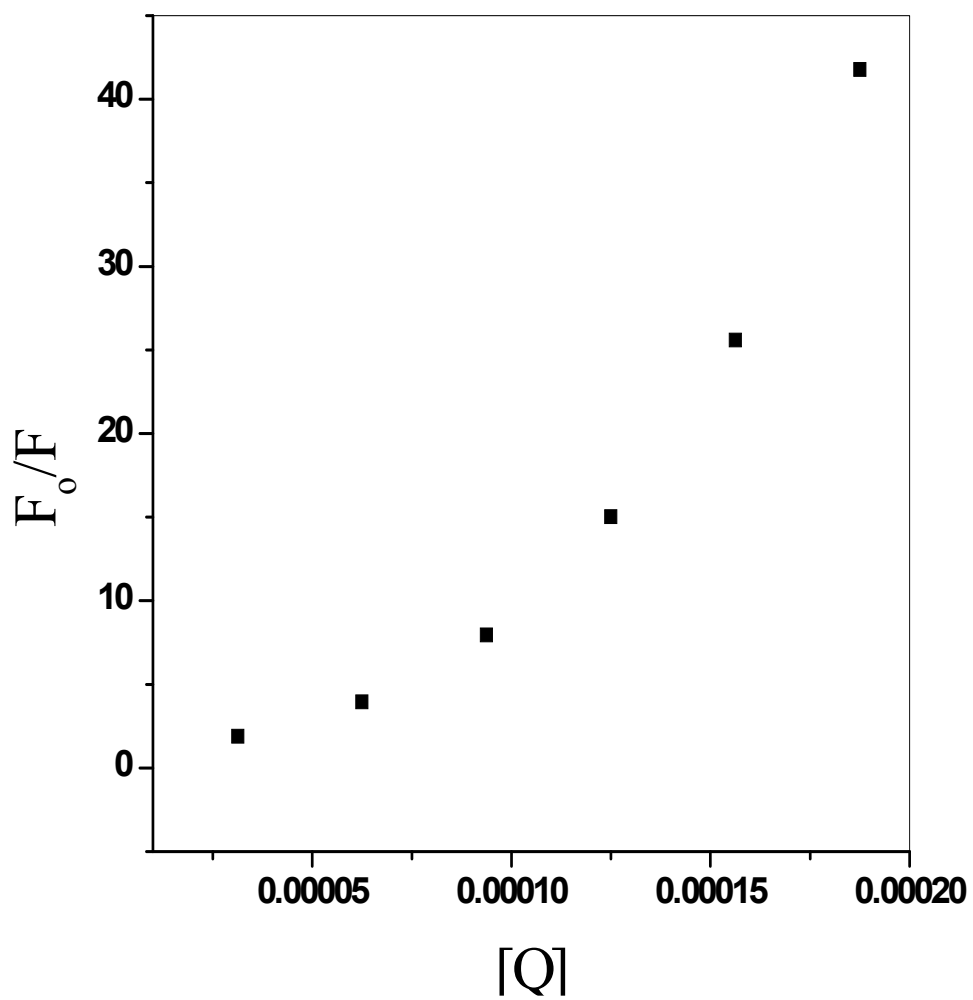

**Figure 3S.** Stern-Volmer plot for the fluorescence quenching of HMB with DCNQ in chloroform at 298 K



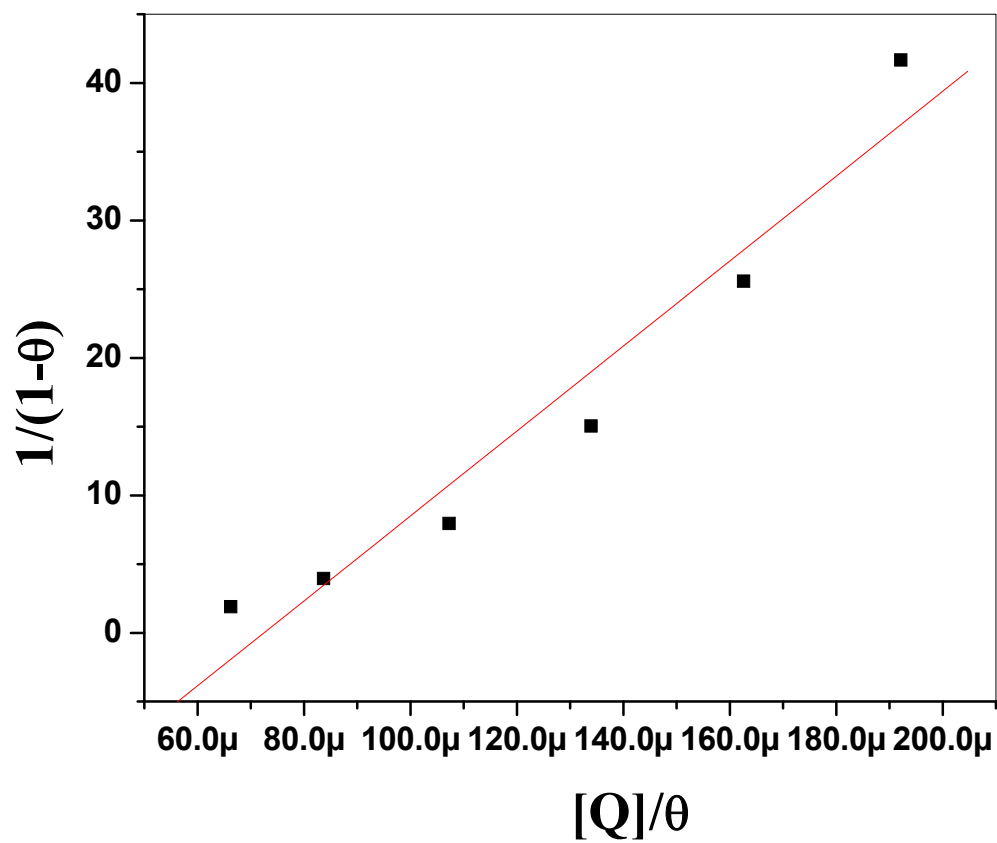

**Figure 4S.** Ward linear plot for HMB- DANQ in chloroform at 298 K

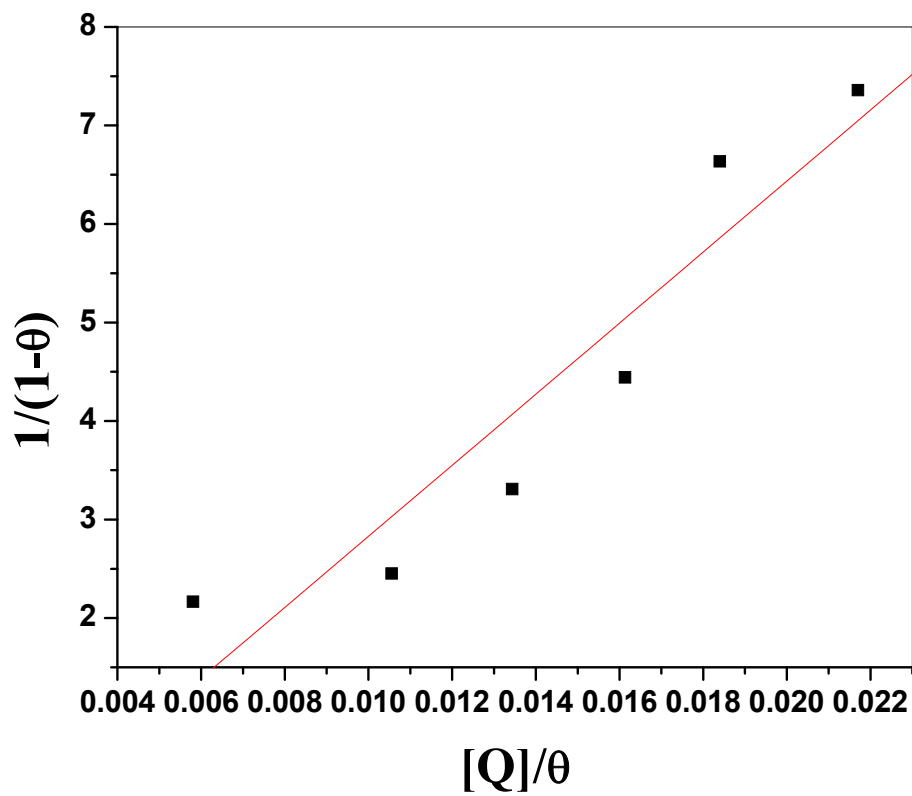

**Figure 5S.** Ward linear plot for HMB- 3g in chloroform at 298 K

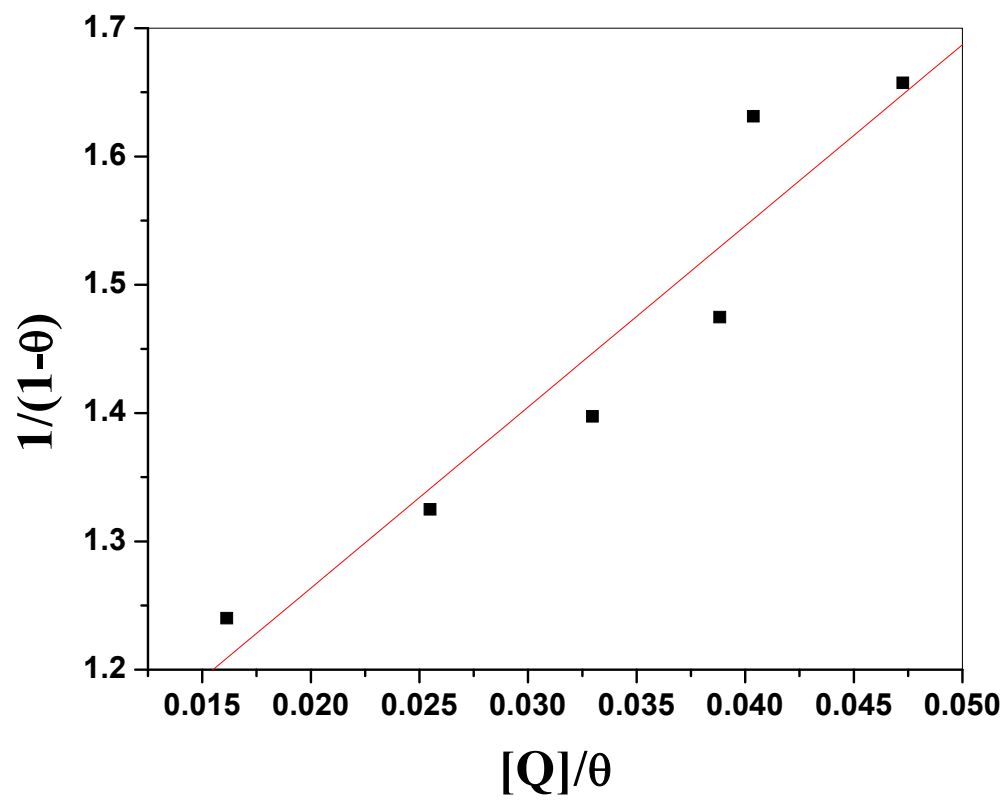

**Figure 6S.** Ward linear plot for HMB- 3i in chloroform at 298 K

Hexamethylbenzene

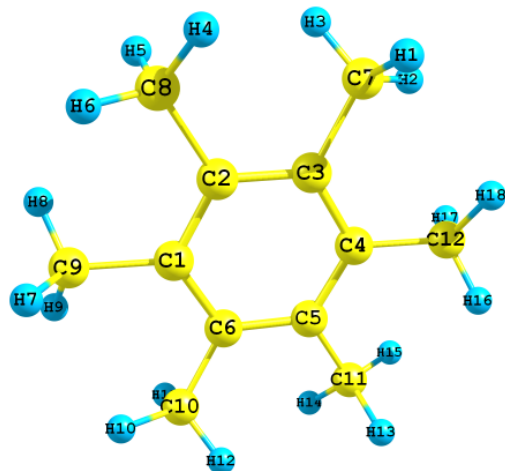

Z - Matrix

|    |   |       |        |      |          |                |
|----|---|-------|--------|------|----------|----------------|
| 1  | C |       |        |      |          |                |
| 2  | C | C(1)  | 1.3989 |      |          |                |
| 3  | C | C(2)  | 1.3989 | C(1) | 119.9788 |                |
| 4  | C | C(3)  | 1.3989 | C(2) | 119.9788 | C(1) -2.9031   |
| 5  | C | C(4)  | 1.3989 | C(3) | 119.9787 | C(2) 2.9031    |
| 6  | C | C(5)  | 1.3989 | C(4) | 119.9788 | C(3) -2.9031   |
| 7  | C | C(3)  | 1.5174 | C(2) | 120.0035 | C(1) 175.7201  |
| 8  | H | C(7)  | 1.0859 | C(3) | 112.1176 | C(2) 90.6886   |
| 9  | H | C(7)  | 1.0781 | C(3) | 111.4463 | C(2) -148.7959 |
| 10 | H | C(7)  | 1.0781 | C(3) | 111.4462 | C(2) -29.8269  |
| 11 | C | C(2)  | 1.5174 | C(1) | 120.0034 | C(6) -175.7201 |
| 12 | H | C(11) | 1.0781 | C(2) | 111.4462 | C(1) 148.7959  |
| 13 | H | C(11) | 1.0859 | C(2) | 112.1176 | C(1) -90.6886  |
| 14 | H | C(11) | 1.0781 | C(2) | 111.4463 | C(1) 29.8269   |
| 15 | C | C(1)  | 1.5174 | C(6) | 120.0035 | C(5) 175.7201  |
| 16 | H | C(15) | 1.0859 | C(1) | 112.1176 | C(6) 90.6886   |
| 17 | H | C(15) | 1.0781 | C(1) | 111.4462 | C(6) -148.7959 |
| 18 | H | C(15) | 1.0781 | C(1) | 111.4462 | C(6) -29.8269  |
| 19 | C | C(6)  | 1.5174 | C(5) | 120.0035 | C(4) -175.7201 |
| 20 | H | C(19) | 1.0781 | C(6) | 111.4463 | C(5) 148.7959  |
| 21 | H | C(19) | 1.0859 | C(6) | 112.1176 | C(5) -90.6886  |
| 22 | H | C(19) | 1.0781 | C(6) | 111.4462 | C(5) 29.8269   |
| 23 | C | C(5)  | 1.5174 | C(4) | 120.0034 | C(3) 175.7201  |
| 24 | H | C(23) | 1.0859 | C(5) | 112.1176 | C(4) 90.6886   |
| 25 | H | C(23) | 1.0781 | C(5) | 111.4462 | C(4) -148.7959 |
| 26 | H | C(23) | 1.0781 | C(5) | 111.4463 | C(4) -29.8269  |
| 27 | C | C(4)  | 1.5174 | C(3) | 120.0035 | C(2) -175.7201 |
| 28 | H | C(27) | 1.0781 | C(4) | 111.4462 | C(3) 148.7959  |
| 29 | H | C(27) | 1.0859 | C(4) | 112.1176 | C(3) -90.6886  |
| 30 | H | C(27) | 1.0781 | C(4) | 111.4462 | C(3) 29.8269   |

Cartesian coordinates

| S.No. | Atom | X       | Y       | Z       |
|-------|------|---------|---------|---------|
| 1     | C    | 0.0000  | 0.0000  | 0.0000  |
| 2     | C    | 0.0000  | 1.3989  | 0.0000  |
| 3     | C    | 1.2118  | 2.0979  | 0.0000  |
| 4     | C    | 2.4220  | 1.3989  | 0.0614  |
| 5     | C    | 2.4220  | 0.0000  | 0.0614  |
| 6     | C    | 1.2102  | -0.6990 | 0.0614  |
| 7     | C    | 1.2142  | 3.6121  | -0.0981 |
| 8     | H    | 1.1895  | 4.0852  | 0.8791  |
| 9     | H    | 2.0920  | 3.9726  | -0.6099 |
| 10    | H    | 0.3636  | 3.9726  | -0.6537 |
| 11    | C    | -1.3137 | 2.1577  | 0.0316  |
| 12    | H    | -1.2134 | 3.0981  | 0.5492  |
| 13    | H    | -1.6858 | 2.3726  | -0.9657 |
| 14    | H    | -2.0781 | 1.6009  | 0.5492  |
| 15    | C    | -1.3104 | -0.7588 | -0.0981 |
| 16    | H    | -1.7325 | -0.9737 | 0.8791  |
| 17    | H    | -2.0476 | -0.2020 | -0.6537 |
| 18    | H    | -1.1840 | -1.6992 | -0.6099 |
| 19    | C    | 1.2077  | -2.2132 | 0.1594  |
| 20    | H    | 0.3300  | -2.5736 | 0.6713  |
| 21    | H    | 1.2325  | -2.6863 | -0.8177 |
| 22    | H    | 2.0584  | -2.5736 | 0.7151  |
| 23    | C    | 3.7356  | -0.7588 | 0.0298  |
| 24    | H    | 4.1077  | -0.9737 | 1.0271  |
| 25    | H    | 3.6353  | -1.6992 | -0.4878 |
| 26    | H    | 4.5001  | -0.2020 | -0.4878 |
| 27    | C    | 3.7324  | 2.1577  | 0.1594  |
| 28    | H    | 4.4696  | 1.6009  | 0.7151  |
| 29    | H    | 4.1545  | 2.3726  | -0.8177 |
| 30    | H    | 3.6060  | 3.0981  | 0.6713  |

Energy = -464.8056953 a.u.

2,3-Diaminonaphthaquinone

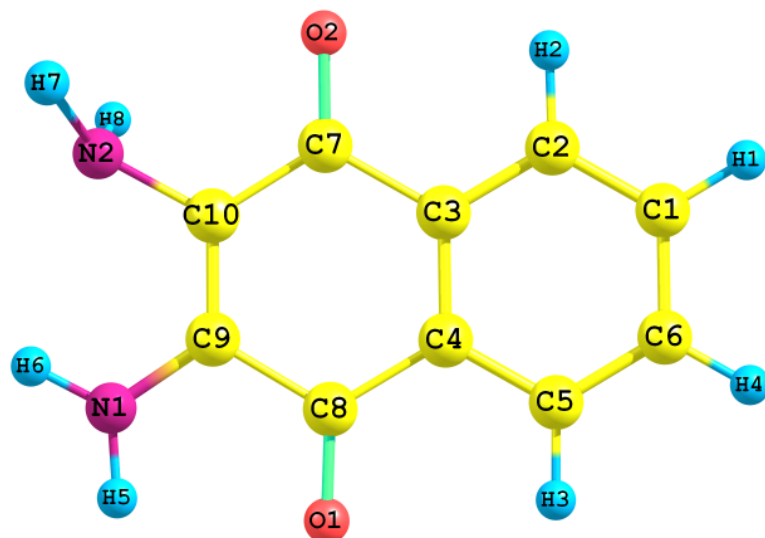

Z - Matrix

|    |   |       |        |       |          |       |           |
|----|---|-------|--------|-------|----------|-------|-----------|
| 1  | C |       |        |       |          |       |           |
| 2  | C | C(1)  | 1.3872 |       |          |       |           |
| 3  | C | C(2)  | 1.3848 | C(1)  | 119.9446 |       |           |
| 4  | C | C(3)  | 1.3944 | C(2)  | 119.6942 | C(1)  | 0.0000    |
| 5  | C | C(4)  | 1.3873 | C(3)  | 120.2863 | C(2)  | 0.0000    |
| 6  | C | C(5)  | 1.3855 | C(4)  | 119.7789 | C(3)  | 0.0000    |
| 7  | H | C(1)  | 1.0702 | C(2)  | 119.7329 | C(3)  | 180.0000  |
| 8  | H | C(2)  | 1.0682 | C(1)  | 121.2679 | C(6)  | -180.0000 |
| 9  | C | C(3)  | 1.4893 | C(2)  | 119.8571 | C(1)  | -180.0000 |
| 10 | C | C(4)  | 1.4727 | C(3)  | 119.8568 | C(2)  | 180.0000  |
| 11 | H | C(5)  | 1.0687 | C(4)  | 119.1232 | C(3)  | -180.0000 |
| 12 | H | C(6)  | 1.0700 | C(5)  | 119.8845 | C(4)  | 180.0000  |
| 13 | C | C(10) | 1.4958 | C(4)  | 118.4040 | C(3)  | 0.0053    |
| 14 | C | C(13) | 1.3489 | C(10) | 121.0204 | C(4)  | -0.0129   |
| 15 | O | C(10) | 1.2206 | C(4)  | 122.6424 | C(3)  | 179.9821  |
| 16 | O | C(9)  | 1.2285 | C(3)  | 120.2222 | C(2)  | -0.0040   |
| 17 | N | C(13) | 1.3458 | C(10) | 115.2003 | C(4)  | 179.9910  |
| 18 | H | N(17) | 0.9879 | C(13) | 120.1616 | C(10) | -0.0078   |
| 19 | H | N(17) | 0.9882 | C(13) | 118.5492 | C(10) | -179.9783 |
| 20 | N | C(14) | 1.4227 | C(13) | 118.7434 | C(10) | -179.9902 |
| 21 | H | N(20) | 0.9972 | C(14) | 113.8615 | C(13) | 116.3289  |
| 22 | H | N(20) | 0.9972 | C(14) | 113.8577 | C(13) | -116.5359 |

Cartesian coordinates

| S.No. | Atom | X       | Y       | Z       |
|-------|------|---------|---------|---------|
| 1     | C    | 0.0000  | 0.0000  | 0.0000  |
| 2     | C    | 0.0000  | 1.3872  | 0.0000  |
| 3     | C    | 1.1999  | 2.0784  | 0.0000  |
| 4     | C    | 2.4031  | 1.3736  | 0.0000  |
| 5     | C    | 2.4012  | -0.0137 | 0.0000  |
| 6     | C    | 1.1978  | -0.7002 | 0.0000  |
| 7     | H    | -0.9293 | -0.5308 | 0.0000  |
| 8     | H    | -0.9130 | 1.9416  | 0.0000  |
| 9     | C    | 1.1977  | 3.5677  | 0.0000  |
| 10    | C    | 3.6812  | 2.1051  | -0.0000 |
| 11    | H    | 3.3342  | -0.5350 | 0.0000  |
| 12    | H    | 1.1944  | -1.7702 | -0.0000 |
| 13    | C    | 3.6452  | 3.6005  | 0.0001  |
| 14    | C    | 2.4728  | 4.2676  | -0.0000 |
| 15    | O    | 4.7631  | 1.5401  | 0.0003  |
| 16    | O    | 0.1352  | 4.1844  | -0.0001 |
| 17    | N    | 4.8488  | 4.2026  | 0.0003  |
| 18    | H    | 5.6749  | 3.6608  | 0.0005  |
| 19    | H    | 4.8828  | 5.1902  | 0.0007  |
| 20    | N    | 2.4952  | 5.6902  | -0.0001 |
| 21    | H    | 2.0971  | 6.0998  | -0.8176 |
| 22    | H    | 2.0940  | 6.0999  | 0.8157  |

Energy = -641.8533439 a.u.

Table S1: Energy gap ( $\Delta E = \text{HOMO-LUMO}$ ) for DANQ and imines (3a–j)

| S.NO | Compound | HOMO<br>(eV) | LUMO<br>(eV) | $\Delta E$         |                    |
|------|----------|--------------|--------------|--------------------|--------------------|
|      |          |              |              | Intra <sup>a</sup> | Inter <sup>b</sup> |
| 1    | DANQ     | -8.8653      | 0.4446       | 9.3099             | 8.5316             |
| 2    | 3a       | -7.6957      | 0.4092       | 8.1049             | 8.4962             |
| 3    | 3b       | -8.1308      | 0.6587       | 8.7895             | 8.7457             |
| 4    | 3c       | -7.8034      | 0.2419       | 8.0453             | 8.3289             |
| 5    | 3d       | -7.6608      | 0.2440       | 7.9048             | 8.3310             |
| 6    | 3e       | -8.0504      | 0.0329       | 8.0833             | 8.1199             |
| 7    | 3f       | -8.6584      | 0.2019       | 8.8603             | 8.2889             |
| 8    | 3g       | -8.5112      | -0.1379      | 8.3733             | 7.9491             |
| 9    | 3h       | -8.4606      | 0.2712       | 8.7318             | 8.3582             |
| 10   | 3i       | -9.3607      | 0.5540       | 9.9147             | 8.6410             |
| 11   | 3j       | -8.2900      | 0.3360       | 8.6260             | 8.4230             |

a – Intra molecular charge transfer within the molecule (DANQ and 3a–3j).

b – Inter molecular charge transfer transition between the corresponding compound and HMB



**Determination of  $K_f$  value by Ward method :**

The experimental results indicated that the quenching efficiency increased with increasing concentration of the electron acceptors (Fig. 4). The fraction of acceptors bound to HMB ( $\theta$ ) was determined by using the following equation.

$$\theta = F_0 - F / F_0 \quad \dots\dots\dots (1)$$

Where,  $F$  and  $F_0$  denote the fluorescence intensities of HMB in the presence of acceptor and in the absence of acceptor, respectively. From the resulting values of  $\theta$ , the association constant  $K_f$  for HMB–DANQ and HMB–imine systems was computed using the method described by Ward [24]. It has been shown that for equivalent and independent binding sites:

$$1 / (1 - \theta) K_f = [Q_T] / \theta - n [D_T] \quad \dots\dots\dots(2)$$

where  $n$  is the number of binding sites,  $[Q_T]$  is the total acceptor concentration and  $[D_T]$  is the total donor concentration. The plot  $1/(1 - \theta)$  versus  $[Q_T] / \theta$  is linear indicating that under the experimental conditions all the binding sites are equivalent and independent. The value of  $K_f$  obtained, from the plots, for HMB –DANQ , HMB – 3g and HMB – 3i systems are found to be  $3.08955 \times 10^5$ ,  $3.6064 \times 10^2$  and  $14.1108 \text{ mol L}^{-1}$ , respectively.

### Solvent Effect on Intramolecular CT Transition<sup>1-3</sup>

The intramolecular CT transition between the amine moiety and the quinone of DANQ is highly solvent dependent. With an aim to investigate the effect of solvent on the absorption maximum of this transition quantitatively, the electronic spectrum of DANQ was recorded in ten different solvents belonging to various types and the data obtained are analyzed using the technique of correlation analysis. The following is the regression equation obtained for the correlation of  $\lambda_{\max}$  versus relative permittivity of the medium.

$$\lambda_{\max} = 0.49 \pm 0.1 \epsilon_r - 251 \pm 57$$

$$(N = 10; r = 0.85)$$

Such a poor correlation obtained may be due to the fact that single solvent parameter is not sufficient enough to explain completely the observed solvent dependence of  $\lambda_{\max}$ . Therefore, in order to obtain a deeper insight into the various solute–solvent interactions, which influence electronic spectra, we have tried to adopt the solvatochromic comparison method developed by Kamlet and Taft. The following regression equation was obtained for the correlation of the absorption maximum with the Kamlet–Taft's solvatochromic parameters  $\alpha$  (hydrogen bond donor, HBD, acidity),  $\beta$  (hydrogen bond acceptor, HBA, basicity) and  $\pi^*$  (dipolarity/polarizability).

$$\lambda_{\max} = 474 \pm 8 + 0.15 \pm 0.07 \alpha + 0.51 \pm 0.10 \beta + 0.73 \pm 0.12 \pi^*$$

$$(N = 10; 100R^2 = 95\%; P\alpha = 11\%; P\beta = 37\%; P\pi^* = 52\%)$$

The absorption maximum of DANQ studied show a good correlation with the solvent with an explained variance of 95%. Such a good correlation indicated the existence of both specific and non-specific solute–solvent interactions. The contributions of each of these solvatochromic parameters to  $\lambda_{\max}$  are also calculated and are listed in the above equation. The results indicated that the contribution of solvent dipolarity/polarizability parameter to the solvent effect was found to dominant and it alone accounts for 52% of the observed solvent effect. The sign of the coefficient of this term is positive indicating an increase in  $\lambda_{\max}$  with an increase in polarity of the medium. The solvent H-bond acceptor basicity also substantially contributed to the observed solvent effect.

1. J. Shorter, *Correlation Analysis of Organic Reactivity*, Research Studies Press, Letchworth, 1982.
2. C. Reichardt, *Solvents and Solvent Effects in Organic Chemistry*, VCH, Weinheim, 1988.
3. C. Reichardt, *Angew. Chem. Int. Ed. Engl.* 18 (1979) 98.
